# Supplementary material for: Dynamic Gene Expression Signatures Predict Psychotherapy Response in PTSD
Source: Research Square preprint supplement (doi:10.21203/rs.3.rs-8801065/v1), 2026-02-18
Supplement: Supplementary file 1 [file b5c847d5f818e6e509437cb6.xlsx]

## Sheet: Table S1
Table S1. Clinical and demographic measures
Variables	Control	PTSD	p.value
Gender: M/F	31/6	50/5	0.48
Race: W/A/B/Others*	17/3/17/0	18/1/29/4	0.122
Age	35.1±8.68	37.1±7.9	0.267
BMI	28.79±4.79	30.79±5.61	0.08
PCL	11.3±11.5	54.5±11.7	< 2.2e-16
CAPS-5	4.73±6.6	46.3±5.6	< 2.2e-16
* W: White; A: Asian; B: Black

## Sheet: Table S2
Table S2. CAPS-5 changes over time for PTSD subgroups
	Responder	Non-responder	p.value
Pre-treatment (T1)	41.4±7.8	51.3±10.5	0.03443
Post-treatment (T2)	15.6±5.0	34.2±9.9	4.686e-05
Follow-up (T3)	14.7±7.7	39.2±6.7	2.077e-05
T1-T3	26.7±13.0	12.1±11.8	0.03159

## Sheet: Table S3
Table S3. Significant DEGs of PTSD vs Control at baseline (time 1)
	logFC	AveExpr	t	P.Value	adj.P.Val	B
SLC12A8	-0.960899	1.2566	-5.55159	4.65349e-08	0.000879788	7.58594
ZNF702P	-0.715176	1.76218	-4.97632	8.99743e-07	0.00850527	4.77377
HAGHL	0.459942	2.3577	4.87623	1.46523e-06	0.00923387	4.52534
FHL1	-0.356668	3.65883	-4.73099	2.92975e-06	0.0138475	4.26039
CEACAM4	0.907053	0.634529	4.61412	5.05135e-06	0.0191002	2.6779
CTD-2270P14.1	-0.20176	5.99031	-4.50821	8.19428e-06	0.0243198	3.35052
PCDHGC3	-0.624968	1.82298	-4.46536	9.939e-06	0.0243198	3.05597
GEM	-0.650435	2.14014	-4.43784	1.12417e-05	0.0243198	3.05928
NRIP3	-0.554938	3.82681	-4.41841	1.22584e-05	0.0243198	3.0092
TRIM9	-0.687451	1.73604	-4.39177	1.3796e-05	0.0243198	2.70457
CRYZ	0.278951	4.11844	4.36964	1.52121e-05	0.0243198	2.81167
TIE1	-0.660278	2.449	-4.36632	1.54362e-05	0.0243198	2.78702
PAQR5	-0.743554	0.698906	-4.22348	2.87043e-05	0.0367634	1.95067
ASGR2	0.661832	2.0992	4.22091	2.90214e-05	0.0367634	2.02277
GGACT	0.296716	2.46642	4.2032	3.13028e-05	0.0367634	2.01187
USP2	-0.807256	0.227807	-4.19266	3.27402e-05	0.0367634	1.64794
ZBTB25	-0.131392	6.97729	-4.1904	3.30571e-05	0.0367634	2.05421
CH17-262A2.1	-0.533282	0.873922	-4.17286	3.56127e-05	0.0374052	1.42311
TRAJ31	-0.371148	2.03616	-4.1359	4.16275e-05	0.0414216	1.68818
RP11-391L3.4	-0.401261	2.3341	-4.10423	4.75402e-05	0.042818	1.63969
CSPG4	-0.707134	1.71268	-4.10413	4.75605e-05	0.042818	1.72489
CARMIL1	-0.29205	4.47951	-4.0918	5.00733e-05	0.0430312	1.73486
GPC4	-0.689246	5.15991	-4.06567	5.58196e-05	0.0458837	1.60864
TM4SF19-AS1	-0.5978	2.24657	-4.04575	6.06162e-05	0.0477504	1.54135

## Sheet: Table S4
Table S4. Significantly enriched pathways (baseline PTSD vs. Control at Time 1)
pathway	pval	padj	ES	NES	nMoreExtreme	size	leadingEdge
Diseases associated with the TLR signaling cascade	0.000209336	0.00682858	0.708446	2.08852	0	28	HMGB1, S100A9, IKBKG, UNC93B1, BTK, S100A8, TLR10, CHUK, TLR4, LY96, CD14, IKBKB, IRAK4
Diseases of Immune System	0.000209336	0.00682858	0.708446	2.08852	0	28	HMGB1, S100A9, IKBKG, UNC93B1, BTK, S100A8, TLR10, CHUK, TLR4, LY96, CD14, IKBKB, IRAK4
Scavenging of heme from plasma	0.000210526	0.00682858	0.687348	2.31767	0	52	IGLV3-21, IGHV1-2, IGKV1D-39, IGLV3-25, IGHA2, CD163, IGLV3-1, IGLV2-8, IGHV4-59, IGLV3-19, IGLC2, IGHA1, IGKV2-30, IGHV1-46, IGHV2-70, IGLV6-57, IGLV1-44, IGHV2-5, IGHV4-34, IGLC3, IGHV4-39, IGLV8-61, IGKV1-39, IGLV7-46, IGHV3-23, IGLV2-14
CD22 mediated BCR regulation	0.000211193	0.00682858	0.696416	2.31394	0	49	IGLV3-21, IGHV1-2, IGKV1D-39, IGLV3-25, IGLV3-1, IGLV2-8, IGHV4-59, IGLV3-19, IGLC2, LYN, IGKV2-30, IGHV1-46, IGHV2-70, IGLV6-57, IGLV1-44, IGHV2-5, IGHV4-34, CD79A, IGLC3, CD79B, CD22, IGHV4-39, IGKV1-39, IGHV3-23, IGLV2-14
Classical antibody-mediated complement activation	0.000211238	0.00682858	0.676319	2.28858	0	53	IGLV3-21, IGHV1-2, IGKV1D-39, IGLV3-25, IGLV3-1, IGLV2-8, IGHV4-59, IGLV3-19, IGLC2, IGHG1, IGKV2-30, IGHV1-46, IGHV2-70, IGLV6-57, IGLV1-44, IGHV2-5, IGHV4-34, IGHG2, IGLC3, IGHG4, IGHV4-39, IGLV8-61, IGKV1-39, IGLV7-46, IGHV3-23, IGLV2-14, IGLV2-11, C1QB, IGKV3-15
rRNA modification in the nucleus and cytosol	0.000211372	0.00682858	0.624711	2.15823	0	59	UTP3, UTP15, SNORD3A, FCF1, TRMT112, RRP9, NHP2, DKC1, DCAF13, UTP6, UTP14C, WDR46, DDX49, NOP14, RPS7, WDR75, EMG1, BMS1, RCL1, THUMPD1, MPHOSPH10, GAR1, TSR3, NOC4L, KRR1, UTP18, WBSCR22, NOP58, NOP56
Regulated Necrosis	0.000211416	0.00682858	0.569369	1.94878	0	56	HMGB1, CASP8, CHMP4A, CHMP2A, CASP4, CASP1, ELANE, RPS27A, IL18, BAX, CHMP2B, TRADD, STUB1, GSDMD, UBB, IL1A, RIPK3, CHMP3, TNFSF10, CASP5, BIRC2
FCGR activation	0.00021164	0.00682858	0.619131	2.14686	0	60	IGLV3-21, IGHV1-2, IGKV1D-39, IGLV3-25, IGLV3-1, IGLV2-8, IGHV4-59, IGLV3-19, IGLC2, IGHG1, SYK, HCK, LYN, IGKV2-30, IGHV1-46, IGHV2-70, IGLV6-57, IGLV1-44, IGHV2-5, IGHV4-34, IGHG2, FCGR2A, IGLC3, IGHG4, IGHV4-39, IGLV8-61, IGKV1-39, IGLV7-46, IGHV3-23, IGLV2-14, FCGR1A, IGLV2-11
Role of LAT2/NTAL/LAB on calcium mobilization	0.00021164	0.00682858	0.592164	2.05335	0	60	IGLV3-21, IGHV1-2, GAB2, IGKV1D-39, IGLV3-25, IGLV3-1, IGLV2-8, IGHV4-59, FCER1G, IGLV3-19, IGLC2, SYK, GRB2, LYN, IGKV2-30, IGHV1-46, IGHV2-70, IGLV6-57, IGLV1-44, IGHV2-5, IGHV4-34, IGLC3, IGHV4-39, IGLV8-61, IGKV1-39, IGLV7-46, IGHV3-23, IGLV2-14
Creation of C4 and C2 activators	0.000212359	0.00682858	0.671467	2.28646	0	55	IGLV3-21, IGHV1-2, IGKV1D-39, IGLV3-25, IGLV3-1, IGLV2-8, IGHV4-59, IGLV3-19, IGLC2, IGHG1, IGKV2-30, IGHV1-46, IGHV2-70, IGLV6-57, IGLV1-44, IGHV2-5, IGHV4-34, IGHG2, IGLC3, IGHG4, IGHV4-39, IGLV8-61, IGKV1-39, IGLV7-46, IGHV3-23, IGLV2-14, IGLV2-11, C1QB, IGKV3-15
Initial triggering of complement	0.000212947	0.00682858	0.649714	2.25763	0	61	IGLV3-21, IGHV1-2, IGKV1D-39, IGLV3-25, IGLV3-1, IGLV2-8, IGHV4-59, IGLV3-19, IGLC2, IGHG1, CFD, IGKV2-30, IGHV1-46, IGHV2-70, IGLV6-57, IGLV1-44, IGHV2-5, IGHV4-34, IGHG2, IGLC3, IGHG4, IGHV4-39, IGLV8-61, IGKV1-39, IGLV7-46, IGHV3-23, IGLV2-14, IGLV2-11, C1QB, IGKV3-15, C2, IGKC
Role of phospholipids in phagocytosis	0.000213538	0.00682858	0.581547	2.07633	0	71	IGLV3-21, IGHV1-2, PLD2, IGKV1D-39, IGLV3-25, PRKCD, IGLV3-1, IGLV2-8, IGHV4-59, IGLV3-19, IGLC2, IGHG1, SYK, IGKV2-30, IGHV1-46, IGHV2-70, IGLV6-57, IGLV1-44, IGHV2-5, IGHV4-34, IGHG2, FCGR2A, IGLC3, IGHG4, IGHV4-39, IGLV8-61, PLD4, IGKV1-39, IGLV7-46, IGHV3-23, IGLV2-14, FCGR1A, PLA2G6, PLD1, IGLV2-11
FCGR3A-mediated IL10 synthesis	0.000213904	0.00682858	0.555998	2.04448	0	83	IGLV3-21, IGHV1-2, IGKV1D-39, IGLV3-25, IGLV3-1, IGLV2-8, IGHV4-59, ADCY7, IGLV3-19, IGLC2, IGHG1, SYK, HCK, LYN, IGKV2-30, IGHV1-46, IL10, IGHV2-70, IGLV6-57, IGLV1-44, IGHV2-5, IGHV4-34, IGHG2, FCGR2A, IGLC3, ADCY6, IGHG4, IGHV4-39, IGLV8-61, IGKV1-39, IGLV7-46, IGHV3-23, IGLV2-14, PRKACB, FCGR1A, IGLV2-11, PRKAR1B, IGKV3-15, PRKACA, IGKC, ADCY9, YES1, ITPR2, IGLV1-40, FCGR3A
Antigen activates B Cell Receptor (BCR) leading to generation of second messengers	0.000213995	0.00682858	0.598656	2.1543	0	74	IGLV3-21, IGHV1-2, IGKV1D-39, BLNK, IGLV3-25, BTK, DAPP1, IGLV3-1, IGLV2-8, IGHV4-59, IGLV3-19, IGLC2, SYK, GRB2, LYN, IGKV2-30, IGHV1-46, IGHV2-70, IGLV6-57, IGLV1-44, IGHV2-5, IGHV4-34, CD19, CD79A, IGLC3, CD79B, ORAI2, NCK1, CD22, IGHV4-39, IGKV1-39, IGHV3-23, IGLV2-14
ER-Phagosome pathway	0.000213995	0.00682858	0.5521	2.03228	0	84	HMGB1, S100A9, IKBKG, BTK, PSMC5, S100A8, PSMB4, CHUK, TLR4, SEC61B, LY96, CD14, IKBKB, RPS27A, PSMC2, STX4, SEC22B, PSMB3, VAMP8, PSMA7, PSMA4, PSMD10, PSMC1, UBB, PSMD14, B2M, PDIA3, TLR1, PSMB8, PSMA3, TLR2, MYD88, TLR6, PSMD7
Regulation of Complement cascade	0.000213995	0.00682858	0.633669	2.2803	0	74	IGLV3-21, IGHV1-2, IGKV1D-39, IGLV3-25, IGLV3-1, IGLV2-8, IGHV4-59, VTN, IGLV3-19, IGLC2, IGHG1, ELANE, CFH, IGKV2-30, IGHV1-46, IGHV2-70, IGLV6-57, IGLV1-44, IGHV2-5, IGHV4-34, CD59, CR2, CD19, IGHG2, IGLC3, PROS1, IGHG4, IGHV4-39, IGLV8-61, IGKV1-39, IGLV7-46, IGHV3-23, IGLV2-14, C5AR2, IGLV2-11, C1QB, IGKV3-15, C2, IGKC
Binding and Uptake of Ligands by Scavenger Receptors	0.000214179	0.00682858	0.618385	2.19995	0	70	IGLV3-21, IGHV1-2, IGKV1D-39, IGLV3-25, IGHA2, CD163, IGLV3-1, IGLV2-8, IGHV4-59, IGLV3-19, IGLC2, SCARB1, IGHA1, IGKV2-30, IGHV1-46, APOE, IGHV2-70, IGLV6-57, IGLV1-44, IGHV2-5, IGHV4-34, STAB1, FTL, IGLC3, IGHV4-39, IGLV8-61, IGKV1-39, IGLV7-46, IGHV3-23, IGLV2-14, IGLV2-11, MSR1, IGKV3-15, COLEC12
Complement cascade	0.000214179	0.00682858	0.631589	2.29538	0	78	IGLV3-21, IGHV1-2, IGKV1D-39, IGLV3-25, IGLV3-1, IGLV2-8, IGHV4-59, VTN, IGLV3-19, IGLC2, IGHG1, ELANE, CFH, CFD, IGKV2-30, IGHV1-46, IGHV2-70, IGLV6-57, IGLV1-44, IGHV2-5, IGHV4-34, CD59, CR2, CD19, IGHG2, IGLC3, PROS1, IGHG4, IGHV4-39, IGLV8-61, IGKV1-39, IGLV7-46, IGHV3-23, IGLV2-14, C5AR2, IGLV2-11, C1QB, IGKV3-15, C2, IGKC
FCERI mediated Ca+2 mobilization	0.00021427	0.00682858	0.55396	2.00178	0	76	IGLV3-21, IGHV1-2, IGKV1D-39, IGLV3-25, TEC, VAV2, BTK, IGLV3-1, IGLV2-8, IGHV4-59, FCER1G, IGLV3-19, IGLC2, SYK, GRB2, LYN, IGKV2-30, IGHV1-46, IGHV2-70, IGLV6-57, IGLV1-44, IGHV2-5, IGHV4-34, PPP3CA, IGLC3, IGHV4-39, IGLV8-61, IGKV1-39, IGLV7-46, IGHV3-23, IGLV2-14
FCERI mediated MAPK activation	0.00021427	0.00682858	0.600512	2.17	0	76	IGLV3-21, IGHV1-2, IGKV1D-39, IGLV3-25, VAV2, IGLV3-1, IGLV2-8, IGHV4-59, FCER1G, IGLV3-19, IGLC2, SYK, MAPK3, GRB2, LYN, IGKV2-30, IGHV1-46, PAK1, IGHV2-70, IGLV6-57, IGLV1-44, IGHV2-5, IGHV4-34, IGLC3, IGHV4-39, IGLV8-61, IGKV1-39, IGLV7-46, NRAS, IGHV3-23, IGLV2-14, IGLV2-11, MAPK9, MS4A2, IGKV3-15, IGKC, RAC1, KRAS, IGLV1-40, IGLV1-47, SHC1, HRAS, PLCG2, IGKV1-16, IGKV3-20, IGKV3-11, VAV1
Antigen processing-Cross presentation	0.00021645	0.00682858	0.542456	2.0353	0	97	HMGB1, S100A9, IKBKG, BTK, PSMC5, S100A8, CYBA, PSMB4, CHUK, TLR4, SEC61B, NCF4, LY96, CD14, IKBKB, RPS27A, PSMC2, STX4, SEC22B, PSMB3, VAMP8, PSMA7, PSMA4, PSMD10, PSMC1, UBB, CTSS, PSMD14, FCGR1A, CTSL, B2M, PDIA3, TLR1, PSMB8, PSMA3, TLR2, MYD88, TLR6, PSMD7
L13a-mediated translational silencing of Ceruloplasmin expression	0.000216967	0.00682858	0.467923	1.78785	0	109	RPS24, RPL6, RPL30, RPL12, RPL11, EIF2S2, RPL26L1, EIF3A, RPS27A, RPL22L1, EIF3M, EIF4H, RPS8, RPL39L, RPL17, RPS7, EIF2S1, RPL28, RPL10A, RPL23, RPL7, RPL41, RPLP2, RPL22, RPS4Y1, RPL21, RPS20, RPL24, EIF3F, RPS27, RPL35A, RPS17, RPL23A, RPL36A, RPS12, RPL4, RPS19, EIF3K, EIF3G, EIF3L, EIF4B, RPL14, RPL37, RPL39, RPS25, FAU, RPLP0, RPS3, RPS9, RPL36, RPL35, RPL13A, EIF1AX, EIF3E
Anti-inflammatory response favouring Leishmania parasite infection	0.000217202	0.00682858	0.556172	2.13019	0	111	IGLV3-21, IGHV1-2, IGKV1D-39, GNB4, IGLV3-25, CD163, IGLV3-1, IGLV2-8, IGHV4-59, ADCY7, IGLV3-19, GNG12, IGLC2, IGHG1, SYK, GNAI3, HCK, LYN, IGKV2-30, IGHV1-46, IL10, IGHV2-70, IGLV6-57, IGLV1-44, IGHV2-5, IGHV4-34, IGHG2, FCGR2A, CYSLTR2, IGLC3, ADCY6, IGHG4, IGHV4-39, IGLV8-61, IGKV1-39, IGLV7-46, GNB1, IGHV3-23, IGLV2-14, PRKACB, FCGR1A, IGLV2-11, PRKAR1B, IGKV3-15, DPEP2, PRKACA, IGKC, ADCY9,…
Leishmania parasite growth and survival	0.000217202	0.00682858	0.556172	2.13019	0	111	IGLV3-21, IGHV1-2, IGKV1D-39, GNB4, IGLV3-25, CD163, IGLV3-1, IGLV2-8, IGHV4-59, ADCY7, IGLV3-19, GNG12, IGLC2, IGHG1, SYK, GNAI3, HCK, LYN, IGKV2-30, IGHV1-46, IL10, IGHV2-70, IGLV6-57, IGLV1-44, IGHV2-5, IGHV4-34, IGHG2, FCGR2A, CYSLTR2, IGLC3, ADCY6, IGHG4, IGHV4-39, IGLV8-61, IGKV1-39, IGLV7-46, GNB1, IGHV3-23, IGLV2-14, PRKACB, FCGR1A, IGLV2-11, PRKAR1B, IGKV3-15, DPEP2, PRKACA, IGKC, ADCY9,…
GTP hydrolysis and joining of the 60S ribosomal subunit	0.00021725	0.00682858	0.474284	1.8138	0	110	RPS24, RPL6, RPL30, RPL12, RPL11, EIF2S2, RPL26L1, EIF3A, RPS27A, RPL22L1, EIF3M, EIF4H, RPS8, RPL39L, RPL17, RPS7, EIF2S1, RPL28, RPL10A, RPL23, RPL7, RPL41, RPLP2, RPL22, RPS4Y1, RPL21, RPS20, RPL24, EIF3F, RPS27, RPL35A, RPS17, RPL23A, RPL36A, RPS12, RPL4, RPS19, EIF3K, EIF3G, EIF5B, EIF3L, EIF4B, RPL14, RPL37, RPL39, RPS25, FAU, RPLP0, RPS3, RPS9, RPL36, EIF5, RPL35, RPL13A, EIF1AX, EIF3E
SRP-dependent cotranslational protein targeting to membrane	0.00021725	0.00682858	0.509282	1.94764	0	110	SRP9, RPS24, SEC11C, SRP14, RPL6, RPL30, RPL12, RPL11, SEC61B, RPL26L1, RPS27A, SPCS3, SEC11A, RPL22L1, SRP72, RPS8, RPL39L, RPL17, RPS7, RPL28, RPL10A, RPL23, RPL7, RPL41, RPLP2, RPL22, RPS4Y1, RPL21, RPS20, SRP54, DDOST, RPL24, RPS27, RPL35A, SPCS2, RPS17, SPCS1, RPL23A, RPL36A, RPS12, RPL4, RPS19
Formation of a pool of free 40S subunits	0.000217297	0.00682858	0.485854	1.82769	0	99	RPS24, RPL6, RPL30, RPL12, RPL11, RPL26L1, EIF3A, RPS27A, RPL22L1, EIF3M, RPS8, RPL39L, RPL17, RPS7, RPL28, RPL10A, RPL23, RPL7, RPL41, RPLP2, RPL22, RPS4Y1, RPL21, RPS20, RPL24, EIF3F, RPS27, RPL35A, RPS17, RPL23A, RPL36A, RPS12, RPL4, RPS19, EIF3K, EIF3G, EIF3L, RPL14, RPL37, RPL39, RPS25, FAU, RPLP0, RPS3, RPS9, RPL36, RPL35, RPL13A, EIF1AX, EIF3E
FCGR3A-mediated phagocytosis	0.000218103	0.00682858	0.530867	2.01176	0	104	IGLV3-21, IGHV1-2, ARPC3, IGKV1D-39, IGLV3-25, VAV2, BTK, ARPC2, IGLV3-1, IGLV2-8, IGHV4-59, MYO5A, IGLV3-19, IGLC2, IGHG1, SYK, HCK, MAPK3, GRB2, LYN, IGKV2-30, IGHV1-46, PTK2, IGHV2-70, IGLV6-57, IGLV1-44, IGHV2-5, IGHV4-34, IGHG2, IGLC3, CRK, NCK1, IGHG4, IGHV4-39, IGLV8-61, IGKV1-39, IGLV7-46, IGHV3-23, CYFIP1, IGLV2-14, WAS, MYO9B, ARPC5, IGLV2-11, IGKV3-15, BRK1, IGKC, RAC1, ACTR2, ABI1
Leishmania phagocytosis	0.000218103	0.00682858	0.530867	2.01176	0	104	IGLV3-21, IGHV1-2, ARPC3, IGKV1D-39, IGLV3-25, VAV2, BTK, ARPC2, IGLV3-1, IGLV2-8, IGHV4-59, MYO5A, IGLV3-19, IGLC2, IGHG1, SYK, HCK, MAPK3, GRB2, LYN, IGKV2-30, IGHV1-46, PTK2, IGHV2-70, IGLV6-57, IGLV1-44, IGHV2-5, IGHV4-34, IGHG2, IGLC3, CRK, NCK1, IGHG4, IGHV4-39, IGLV8-61, IGKV1-39, IGLV7-46, IGHV3-23, CYFIP1, IGLV2-14, WAS, MYO9B, ARPC5, IGLV2-11, IGKV3-15, BRK1, IGKC, RAC1, ACTR2, ABI1
Parasite infection	0.000218103	0.00682858	0.530867	2.01176	0	104	IGLV3-21, IGHV1-2, ARPC3, IGKV1D-39, IGLV3-25, VAV2, BTK, ARPC2, IGLV3-1, IGLV2-8, IGHV4-59, MYO5A, IGLV3-19, IGLC2, IGHG1, SYK, HCK, MAPK3, GRB2, LYN, IGKV2-30, IGHV1-46, PTK2, IGHV2-70, IGLV6-57, IGLV1-44, IGHV2-5, IGHV4-34, IGHG2, IGLC3, CRK, NCK1, IGHG4, IGHV4-39, IGLV8-61, IGKV1-39, IGLV7-46, IGHV3-23, CYFIP1, IGLV2-14, WAS, MYO9B, ARPC5, IGLV2-11, IGKV3-15, BRK1, IGKC, RAC1, ACTR2, ABI1
Regulation of actin dynamics for phagocytic cup formation	0.000218103	0.00682858	0.549004	2.08825	0	106	IGLV3-21, IGHV1-2, ARPC3, IGKV1D-39, IGLV3-25, VAV2, BTK, ARPC2, IGLV3-1, IGLV2-8, IGHV4-59, MYO5A, IGLV3-19, IGLC2, IGHG1, SYK, MAPK3, GRB2, IGKV2-30, IGHV1-46, PTK2, PAK1, IGHV2-70, IGLV6-57, IGLV1-44, IGHV2-5, IGHV4-34, IGHG2, FCGR2A, IGLC3, CRK, NCK1, IGHG4, IGHV4-39, IGLV8-61, IGKV1-39, IGLV7-46, IGHV3-23, CYFIP1, IGLV2-14, WAS, FCGR1A, MYO9B, ARPC5, IGLV2-11, IGKV3-15, BRK1, IGKC, RAC1, NF2…
FCERI mediated NF-kB activation	0.000218293	0.00682858	0.524944	2.03868	0	123	IGLV3-21, IGHV1-2, IGKV1D-39, IGLV3-25, IKBKG, PSMC5, RASGRP4, IGLV3-1, IGLV2-8, IGHV4-59, FCER1G, PSMB4, CHUK, IGLV3-19, IGLC2, IKBKB, RPS27A, PSMC2, LYN, IGKV2-30, IGHV1-46, IGHV2-70, IGLV6-57, IGLV1-44, IGHV2-5, TAB3, IGHV4-34, IGLC3, PSMB3, PSMA7, PSMA4, PSMD10, PSMC1, IGHV4-39, IGLV8-61, CUL1, IGKV1-39, IGLV7-46, UBB, RASGRP2, PSMD14, IGHV3-23, IGLV2-14
Fcgamma receptor (FCGR) dependent phagocytosis	0.000220216	0.00682858	0.489216	1.91143	0	129	IGLV3-21, IGHV1-2, ARPC3, PLD2, IGKV1D-39, IGLV3-25, VAV2, BTK, PRKCD, ARPC2, IGLV3-1, IGLV2-8, IGHV4-59, MYO5A, IGLV3-19, IGLC2, IGHG1, SYK, HCK, MAPK3, GRB2, LYN, IGKV2-30, IGHV1-46, PTK2, PAK1, IGHV2-70, IGLV6-57, IGLV1-44, IGHV2-5, IGHV4-34, IGHG2, FCGR2A, IGLC3, CRK, NCK1, IGHG4, IGHV4-39, IGLV8-61, PLD4, IGKV1-39, IGLV7-46, IGHV3-23, CYFIP1, IGLV2-14, WAS, FCGR1A, PLA2G6, MYO9B, PLD1, ARPC5…
Potential therapeutics for SARS	0.000220313	0.00682858	0.469832	1.85097	0	136	IGLV3-21, IGHV1-2, IGKV1D-39, BLNK, IGLV3-25, IMPDH1, BTK, IGLV3-1, IGLV2-8, IGHV4-59, IGLV3-19, SUDS3, NFE2L2, IGLC2, SAP30L, ATP1B1, SYK, RBX1, TBK1, GRB2, JAK2, IGKV2-30, IGHV1-46, IGHV2-70, IGLV6-57, IGLV1-44, IGHV2-5, IL1R1, IGHV4-34, CD79A, IGLC3, IFNGR1, CD79B, NCK1, IGHV4-39, FXYD7, IGKV1-39, MTA1, IGHV3-23, IGLV2-14, RBBP7, COMT, IFNGR2, AP2A2, IGLV2-11
Signaling by the B Cell Receptor (BCR)	0.000220459	0.00682858	0.485952	1.94465	0	151	IGLV3-21, IGHV1-2, IGKV1D-39, BLNK, IGLV3-25, IKBKG, BTK, DAPP1, PSMC5, IGLV3-1, IGLV2-8, IGHV4-59, PSMB4, CHUK, IGLV3-19, IGLC2, SYK, GRB2, IKBKB, RPS27A, PSMC2, LYN, IGKV2-30, IGHV1-46, IGHV2-70, IGLV6-57, IGLV1-44, IGHV2-5, IGHV4-34, CD19, CD79A, PPP3CA, IGLC3, PSMB3, PSMA7, PSMA4, PSMD10, CD79B, PSMC1, ORAI2, NCK1, CD22, IGHV4-39, CUL1, IGKV1-39, NRAS, UBB, PSMD14, IGHV3-23, IGLV2-14
Immunoregulatory interactions between a Lymphoid and a non-Lymphoid cell	0.000222222	0.00682858	0.469929	1.89662	0	162	IGLV3-21, SIGLEC1, IGHV1-2, CD33, IGKV1D-39, IGLV3-25, CD1D, LILRA6, LAIR1, SIGLEC6, LILRA5, IGLV3-1, LILRA4, IGLV2-8, IGHV4-59, IGLV3-19, LILRA1, LILRB2, SIGLEC5, IGLC2, CD300E, LILRB5, IGKV2-30, IGHV1-46, IGHV2-70, IGLV6-57, IGLV1-44, IGHV2-5, IGHV4-34, CD19, TREML2, IGLC3, LILRB1, CD22, IGHV4-39, KIR3DL2, IGLV8-61, IGKV1-39, IGLV7-46, SIGLEC9, IGHV3-23, IGLV2-14, TREM2, CLEC2B, KIR3DL1, FCGR1A…
mRNA Splicing - Major Pathway	0.00022242	0.00682858	0.479738	1.99277	0	201	CWC25, ALYREF, POLR2E, RNF113A, PPIH, HNRNPA1, MAGOH, NCBP2, SNRPF, BCAS2, HNRNPD, RBM17, SNRPA1, LSM7, HNRNPH2, CWC15, HNRNPM, DDX42, POLR2G, DDX5, CDC40, XAB2, LSM3, SNRPD3, DDX46, SRSF7, SYF2, C9orf78, YBX1, CTNNBL1, SRSF5, CASC3, DDX39B, SRSF1, DHX38, SRSF6, RBMX2, CWC22, POLR2B, LENG1, SART1, ISY1, HTATSF1, PUF60, PRPF3, MFAP1, SF3B6, SNRPC, PRKRIP1, HNRNPK, NSRP1, HNRNPA3, SNRPD1, PPIL1, PL…
rRNA processing in the nucleus and cytosol	0.000223314	0.00682858	0.542284	2.23185	0	188	UTP3, MPHOSPH6, UTP15, SNORD3A, CSNK1E, EXOSC9, RPS24, BYSL, RPL6, RPL30, RPL12, RPL11, FCF1, EXOSC2, RPL26L1, TRMT112, RIOK2, SENP3, RRP9, NCL, RPS27A, LAS1L, NHP2, RPL22L1, GNL3, DKC1, PELP1, LTV1, RPS8, RPP40, DCAF13, EXOSC8, RPL39L, UTP6, UTP14C, WDR46, DDX49, RPL17, NOP14, RPS7, C1D, WDR75, RPL28, RPL10A, EMG1, BMS1, RPL23, RCL1, RPL7, THUMPD1, RPL41, MPHOSPH10, GAR1, RPLP2, TSR3, RPP25, RPL…
Major pathway of rRNA processing in the nucleolus and cytosol	0.000223414	0.00682858	0.535712	2.18783	0	178	UTP3, MPHOSPH6, UTP15, SNORD3A, CSNK1E, EXOSC9, RPS24, BYSL, RPL6, RPL30, RPL12, RPL11, FCF1, EXOSC2, RPL26L1, RIOK2, SENP3, RRP9, NCL, RPS27A, LAS1L, RPL22L1, GNL3, PELP1, LTV1, RPS8, RPP40, DCAF13, EXOSC8, RPL39L, UTP6, UTP14C, WDR46, DDX49, RPL17, NOP14, RPS7, C1D, WDR75, RPL28, RPL10A, EMG1, BMS1, RPL23, RCL1, RPL7, RPL41, MPHOSPH10, RPLP2, RPP25, RPL22, RPS4Y1, NOC4L, RPL21, RPS20, KRR1, DIS…
mRNA Splicing	0.000223514	0.00682858	0.482015	2.01272	0	212	CWC25, ALYREF, POLR2E, RNF113A, PPIH, HNRNPA1, MAGOH, NCBP2, SNRPF, BCAS2, SNRNP25, HNRNPD, ZCRB1, RBM17, SNRPA1, LSM7, HNRNPH2, CWC15, HNRNPM, DDX42, POLR2G, DDX5, CDC40, XAB2, LSM3, SNRNP35, SNRPD3, DDX46, SRSF7, SYF2, C9orf78, YBX1, CTNNBL1, SRSF5, CASC3, DDX39B, SRSF1, DHX38, SRSF6, RBMX2, CWC22, POLR2B, LENG1, SART1, ISY1, HTATSF1, PUF60, PRPF3, MFAP1, SF3B6, SNRPC, PRKRIP1, HNRNPK, NSRP1, H…
rRNA processing	0.000224115	0.00682858	0.456508	1.90855	0	218	UTP3, MPHOSPH6, UTP15, TRMT10C, SNORD3A, CSNK1E, EXOSC9, RPS24, MRM2, BYSL, MT-TR, RPL6, RPL30, RPL12, RPL11, HSD17B10, FCF1, EXOSC2, RPL26L1, TRMT112, RIOK2, SENP3, RRP9, NCL, RPS27A, LAS1L, NHP2, RPL22L1, GNL3, DKC1, PELP1, LTV1, RPS8, RPP40, DCAF13, EXOSC8, RPL39L, UTP6, UTP14C, WDR46, DDX49, RPL17, NOP14, RPS7, C1D, WDR75, RPL28, RPL10A, EMG1, NSUN4, MT-TK, BMS1, RPL23, RCL1, RPL7, THUMPD1, R…
Leishmania infection	0.000224517	0.00682858	0.502458	2.06837	0	189	IGLV3-21, IGHV1-2, ARPC3, P2RX4, IGKV1D-39, GNB4, IGLV3-25, VAV2, BTK, MEFV, CD163, ARPC2, IGLV3-1, CYBA, IGLV2-8, IGHV4-59, ADCY7, MYO5A, IGLV3-19, PYCARD, GNG12, CASP1, IGLC2, IGHG1, SYK, GNAI3, HCK, MAPK3, GRB2, IL18, HMOX1, LYN, IGKV2-30, IGHV1-46, PTK2, IL10, IGHV2-70, IGLV6-57, IGLV1-44, IGHV2-5, IGHV4-34, IGHG2, FCGR2A, CYSLTR2, IGLC3, ADCY6, TXNIP, CRK, NCK1, TXN, IGHG4, IGHV4-39, IGLV8-6…
Parasitic Infection Pathways	0.000224517	0.00682858	0.502458	2.06837	0	189	IGLV3-21, IGHV1-2, ARPC3, P2RX4, IGKV1D-39, GNB4, IGLV3-25, VAV2, BTK, MEFV, CD163, ARPC2, IGLV3-1, CYBA, IGLV2-8, IGHV4-59, ADCY7, MYO5A, IGLV3-19, PYCARD, GNG12, CASP1, IGLC2, IGHG1, SYK, GNAI3, HCK, MAPK3, GRB2, IL18, HMOX1, LYN, IGKV2-30, IGHV1-46, PTK2, IL10, IGHV2-70, IGLV6-57, IGLV1-44, IGHV2-5, IGHV4-34, IGHG2, FCGR2A, CYSLTR2, IGLC3, ADCY6, TXNIP, CRK, NCK1, TXN, IGHG4, IGHV4-39, IGLV8-6…
Cell Cycle Checkpoints	0.000228519	0.00682858	0.400605	1.69916	0	248	MAD2L1, CDC7, NSL1, CENPQ, RBBP8, PSMC5, UBE2E1, CENPF, NUP37, PSMB4, MCM8, BUB1B, BLM, CDK2, RFC4, ZWILCH, CDC26, CENPE, MRE11, ATRIP, RPS27A, RAD17, PSMC2, MCM7, CENPM, CDC45, INCENP, DYNC1LI1, YWHAE, BRIP1, CDKN1B, KNL1, MCM2, PSMB3, RMI2, NUDC, PSMA7, PSMA4, PSMD10, PSMC1, DYNC1I2, RFC3, ZWINT, CDK1, NDC80, UBB, RAD50, PSMD14, NBN, MCM6, SKA1, NUF2, DYNC1LI2, CHEK2, MAPRE1, UBE2V2, ORC6, SPC2…
Translation	0.000229991	0.00682858	0.401196	1.72008	0	272	MRPL36, SRP9, MRPL16, RPS24, SEC11C, SRP14, MTIF2, MRPL18, GFM1, RPL6, RPL30, RPL12, RPL11, SEC61B, MRPL40, LARS2, EIF2S2, RPL26L1, TRMT112, AIMP1, MRPL12, EIF3A, MRPL52, RPS27A, MRPS21, GADD45GIP1, MRPL27, SPCS3, VARS2, SEC11A, RPL22L1, MRPL13, ETF1, EIF3M, EIF4H, MRPL22, SRP72, RPS8, HARS2, RPL39L, MRPL50, MTRF1L, MRPS36, RPL17, RPS7, EIF2S1, MRPL54, EIF2B1, RPL28, MRPS16, MTIF3, CHCHD1, MRPL33…
Processing of Capped Intron-Containing Pre-mRNA	0.000231321	0.00682858	0.441674	1.8973	0	279	CWC25, ALYREF, POLR2E, RNF113A, PPIH, THOC7, HNRNPA1, MAGOH, NCBP2, SNRPF, BCAS2, SNRNP25, NUP37, HNRNPD, ZCRB1, RBM17, SNRPA1, LSM7, HNRNPH2, CWC15, PABPN1, HNRNPM, THOC6, DDX42, POLR2G, DDX5, CDC40, XAB2, LSM3, SNRNP35, SNRPD3, DDX46, SRSF7, SYF2, METTL3, CPSF4, C9orf78, YBX1, METTL14, CTNNBL1, SRSF5, NUP54, CASC3, DDX39B, TPR, SRSF1, CPSF1, DHX38, SRSF6, RBMX2, CWC22, POLR2B, LENG1, SART1, ISY…
Metabolism of amino acids and derivatives	0.00023359	0.00682858	0.360819	1.55345	0	290	DDO, IDO2, FAH, DHTKD1, RPS24, PSMC5, PAOX, HNMT, GCDH, SAT1, PSMB4, ALDH4A1, RPL6, RPL30, RPL12, RPL11, HSD17B10, RIMKLB, AFMID, RPL26L1, AIMP1, CTH, SMS, RPS27A, IVD, AMDHD1, TST, PSMC2, GOT1, PXMP2, RPL22L1, SDSL, SEPSECS, MPST, ALDH7A1, PSMB3, PSMA7, PSMA4, PSMD10, PSMC1, GLUD1, HAAO, RPS8, RPL39L, PIPOX, MRPS36, AZIN1, SUOX, PSMD14, SDS, RPL17, RPS7, RPL28, RPL10A, MTR, RPL23, RPL7, RPL41, P…
M Phase	0.000236686	0.00682858	0.379026	1.65764	0	340	MAD2L1, NSL1, HAUS1, CENPQ, CSNK1E, CEP131, PSMC5, CC2D1B, UBE2E1, CENPF, NUP37, PSMB4, VRK2, NEK9, BUB1B, CHMP4A, MZT2B, CHMP2A, ZWILCH, CDC26, CENPE, CEP76, MAPK3, RPS27A, RB1, CEP57, PSMC2, CHMP2B, BLZF1, CENPM, RAB2A, PLK4, HAUS5, HAUS4, INCENP, DYNC1LI1, YWHAE, KIF23, KNL1, CEP250, PSMB3, NUDC, PSMA7, PSMA4, PSMD10, PSMC1, DYNC1I2, NUP54, HAUS2, EMD, TPR, ZWINT, GOLGA2, LMNB1, SUMO1, CDK1, N…
SARS-CoV Infections	0.000238834	0.00682858	0.351263	1.56316	0	410	IGLV3-21, IGHV1-2, IGKV1D-39, BLNK, IGLV3-25, PPIH, IMPDH1, IKBKG, RPS24, BTK, HNRNPA1, SNRPF, TKFC, IRAK1, IGLV3-1, NUP37, IGLV2-8, IGHV4-59, NOD1, ZCRB1, CHUK, NLRP12, CHMP4A, IGLV3-19, PYCARD, SUDS3, NOD2, PARP4, DDX5, CHMP2A, NFE2L2, CASP1, IGLC2, SAP30L, ATP1B1, SYK, RBX1, TBK1, GRB2, IKBKB, RPS27A, RB1, SNRPD3, JAK2, CNBP, IGKV2-30, VPS33B, CHMP2B, IGHV1-46, GALNT1, IGHV2-70, IGLV6-57, IGLV…
Neutrophil degranulation	0.000239292	0.00682858	0.416179	1.86195	0	433	CRISPLD2, ARSA, CD33, HMGB1, DBNL, LAIR1, CLEC4D, C6orf120, CPPED1, SERPINB1, IMPDH1, RNASE2, S100A9, ADGRG3, CD47, AGPAT2, S100A8, SRP14, RNASET2, RAB44, TRPM2, CTSC, PRKCD, ACAA1, CYBA, BST1, FCER1G, CEACAM6, GAA, FPR2, CD58, HSPA6, PYCARD, ALOX5, GMFG, LILRB2, DNASE1L1, SIGLEC5, GCA, PLAC8, FPR1, DPP7, NFAM1, TXNDC5, PGLYRP1, ELANE, S100A12, CD14, P2RX1, NIT2, CFD, ACTR10, RAB5C, RAP2B, CAMP, …
Cell Cycle, Mitotic	0.000242014	0.00682858	0.355808	1.6065	0	481	MAD2L1, CDC7, NSL1, HAUS1, CENPQ, CSNK1E, CDK7, CEP131, PSMC5, CC2D1B, UBE2E1, CENPF, NUP37, PSMB4, MCM8, VRK2, NEK9, BUB1B, CHMP4A, MZT2B, CDK2, CHMP2A, RFC4, ZWILCH, CDC26, CENPE, MYBL2, CEP76, RBX1, MAPK3, RPS27A, RB1, SKP2, JAK2, CEP57, PSMC2, LYN, CHMP2B, TFDP1, MCM7, BLZF1, CENPM, RAB8A, POLD3, RAB2A, PLK4, HAUS5, CDC45, HAUS4, INCENP, DYNC1LI1, YWHAE, CDKN1B, KIF23, KNL1, FKBPL, MCM2, LIN9…
Extracellular matrix organization	0.000362056	0.0100192	-0.418904	-1.67975	1	188	MMP19, TNC, TIMP1, JAM2, COL8A2, ITGA7, BMP1, ITGB3, ITGA5, EMILIN1, ITGA6, ADAM12, COL6A2, SERPINE1, MMP9, CD44, PDGFA, LAMA2, MMP7, VWF, COL6A1, SPARC, ITGA10, SCUBE3, DAG1, SDC2, ITGA11, NCAM1, COL18A1, SPP1, ACTN1, MMP12, LAMB3, COL5A1, APP, LOXL3, LOXL4, ITGA1, SERPINH1, HSPG2, COL5A3, ITGAX, COL6A3, ITGB7
Selenocysteine synthesis	0.000431499	0.0101258	0.483465	1.79602	1	90	RPS24, RPL6, RPL30, RPL12, RPL11, RPL26L1, RPS27A, RPL22L1, SEPSECS, RPS8, RPL39L, RPL17, RPS7, RPL28, RPL10A, RPL23, RPL7, RPL41, RPLP2, RPL22, RPS4Y1, RPL21, RPS20, RPL24, RPS27, RPL35A, SEPHS2, RPS17, RPL23A, RPL36A, RPS12, RPL4, RPS19, RPL14, RPL37, RPL39, RPS25, FAU, RPLP0, RPS3, RPS9, RPL36, RPL35, RPL13A
Eukaryotic Translation Termination	0.000431872	0.0101258	0.485087	1.80417	1	91	RPS24, RPL6, RPL30, RPL12, RPL11, RPL26L1, TRMT112, RPS27A, RPL22L1, ETF1, RPS8, RPL39L, RPL17, RPS7, RPL28, RPL10A, RPL23, RPL7, RPL41, RPLP2, RPL22, RPS4Y1, RPL21, RPS20, RPL24, RPS27, RPL35A, RPS17, RPL23A, RPL36A, RPS12, RPL4, RPS19, GSPT2, RPL14, RPL37, RPL39, RPS25, FAU, RPLP0, RPS3, RPS9, RPL36, RPL35, RPL13A
Synthesis of DNA	0.00043611	0.0101258	0.448412	1.73344	1	118	PSMC5, UBE2E1, PSMB4, MCM8, CDK2, RFC4, CDC26, RBX1, RPS27A, SKP2, PSMC2, MCM7, POLD3, CDC45, MCM2, PRIM1, PSMB3, PSMA7, PSMA4, PSMD10, PSMC1, RFC1, RFC3, CUL1, UBB, PSMD14, MCM6, ORC6, PSMB8, RFC2, ANAPC4, CCNE1, MCM4, PSMA3, PSMD7, GINS1, UBE2C, PSMC3, DNA2, ANAPC10, PSMB1, CDC23, RPA1, CDT1, POLA2, CCNA2, PCNA, PSMD13, RPA2, LIG1, PSMD4, PSME1, ANAPC2, PSME2, MCM5, PSMC6, POLD4, FZR1, UBE2S, A…
Cap-dependent Translation Initiation	0.000437158	0.0101258	0.457347	1.76447	1	117	RPS24, RPL6, RPL30, RPL12, RPL11, EIF2S2, RPL26L1, EIF3A, RPS27A, RPL22L1, EIF3M, EIF4H, RPS8, RPL39L, RPL17, RPS7, EIF2S1, EIF2B1, RPL28, RPL10A, RPL23, RPL7, RPL41, RPLP2, RPL22, RPS4Y1, RPL21, RPS20, RPL24, EIF3F, RPS27, RPL35A, EIF4EBP1, RPS17, RPL23A, RPL36A, RPS12, RPL4, RPS19, EIF3K, EIF3G, EIF5B, EIF3L, EIF4B, RPL14, RPL37, RPL39, RPS25, FAU, RPLP0, RPS3, RPS9, RPL36, EIF5, RPL35, RPL13A,…
Eukaryotic Translation Initiation	0.000437158	0.0101258	0.457347	1.76447	1	117	RPS24, RPL6, RPL30, RPL12, RPL11, EIF2S2, RPL26L1, EIF3A, RPS27A, RPL22L1, EIF3M, EIF4H, RPS8, RPL39L, RPL17, RPS7, EIF2S1, EIF2B1, RPL28, RPL10A, RPL23, RPL7, RPL41, RPLP2, RPL22, RPS4Y1, RPL21, RPS20, RPL24, EIF3F, RPS27, RPL35A, EIF4EBP1, RPS17, RPL23A, RPL36A, RPS12, RPL4, RPS19, EIF3K, EIF3G, EIF5B, EIF3L, EIF4B, RPL14, RPL37, RPL39, RPS25, FAU, RPLP0, RPS3, RPS9, RPL36, EIF5, RPL35, RPL13A,…
Regulation of expression of SLITs and ROBOs	0.000441209	0.0101258	0.451324	1.81704	1	157	RPS24, UPF3A, PSMC5, MAGOH, SLIT2, NCBP2, PSMB4, RPL6, RPL30, RPL12, RPL11, RPL26L1, RBX1, RPS27A, PSMC2, RPL22L1, ETF1, PSMB3, PSMA7, PSMA4, PSMD10, PSMC1, CASC3, RPS8, RPL39L, UBB, PSMD14, RPL17, ROBO1, RPS7, RPL28, RPL10A, LDB1, RPL23, RPL7, RPL41, PSMB8, MAGOHB, RPLP2, RPL22, RPS4Y1, PSMA3, RPL21, RPS20, RPL24, PSMD7, EIF4A3, RPS27, RPL35A, PSMC3, RPS17, RPL23A, PSMB1, RPL36A, RPS12, RPL4, ZS…
S Phase	0.00044238	0.0101258	0.429522	1.73324	1	160	CDK7, PSMC5, UBE2E1, PSMB4, MCM8, CDK2, RFC4, CDC26, RBX1, RPS27A, RB1, SKP2, PSMC2, TFDP1, MCM7, POLD3, CDC45, CDKN1B, MCM2, LIN9, PRIM1, CKS1B, PSMB3, PSMA7, PSMA4, PSMD10, PSMC1, RFC1, RFC3, CUL1, CDCA5, SMC1A, UBB, SMC3, PSMD14, LIN52, MCM6, CABLES1, ORC6, AKT3, CDK4, PSMB8, AKT1, RFC2, ANAPC4, CCNE1, MCM4, PSMA3, PSMD7, WEE1, WAPL, GINS1, ESCO2, UBE2C, PSMC3, DNA2, ANAPC10, PSMB1, CDC23, RPA…
Mitotic G1 phase and G1/S transition	0.000443459	0.0101258	0.435516	1.7336	1	147	CDC7, CDK7, PSMC5, PSMB4, MCM8, CDK2, MYBL2, RPS27A, RB1, SKP2, JAK2, PSMC2, LYN, TFDP1, MCM7, CDC45, CDKN1B, MCM2, LIN9, PRIM1, CKS1B, PSMB3, PSMA7, PSMA4, CDKN2D, PSMD10, E2F2, PSMC1, CUL1, CDK1, UBB, PSMD14, LIN52, MCM6, TK1, CABLES1, ORC6, AKT3, CDK4, TYMS, PSMB8, CDKN2C, AKT1, CCNE1, CCND3, MCM4, PSMA3, PSMD7, WEE1, TOP2A, PSMC3, PSMB1, RPA1, CDT1, POLA2, CCNA2, PCNA, PSMD13, RPA2, PSMD4, MC…
Fc epsilon receptor (FCERI) signaling	0.000443557	0.0101258	0.446952	1.8188	1	171	IGLV3-21, IGHV1-2, GAB2, IGKV1D-39, IGLV3-25, TEC, IKBKG, VAV2, BTK, PSMC5, RASGRP4, IGLV3-1, IGLV2-8, IGHV4-59, FCER1G, PSMB4, CHUK, IGLV3-19, IGLC2, SYK, MAPK3, GRB2, IKBKB, RPS27A, PSMC2, LYN, IGKV2-30, IGHV1-46, PAK1, IGHV2-70, IGLV6-57, IGLV1-44, IGHV2-5, TAB3, IGHV4-34, PPP3CA, IGLC3, PSMB3, PSMA7, PSMA4, PSMD10, PSMC1, IGHV4-39, IGLV8-61, CUL1, IGKV1-39, IGLV7-46, NRAS, UBB, RASGRP2, PSMD1…
Mitotic Prometaphase	0.000448229	0.0101258	0.393288	1.62015	1	190	MAD2L1, NSL1, HAUS1, CENPQ, CSNK1E, CEP131, CENPF, NUP37, NEK9, BUB1B, MZT2B, ZWILCH, CENPE, CEP76, CEP57, CENPM, PLK4, HAUS5, HAUS4, INCENP, DYNC1LI1, YWHAE, KNL1, CEP250, NUDC, DYNC1I2, HAUS2, ZWINT, CDK1, NDC80, CDCA5, SMC1A, SMC3, SKA1, NUF2, DYNC1LI2, MAPRE1, SPC24, ODF2, DCTN3, NEK2, SKA2, DCTN2, NCAPG, SSNA1, SMC4, PRKACA, CENPI, MAD1L1, CDCA8, WAPL, RPS27, PAFAH1B1, NUP107, CNTRL, CEP164,…
Mitotic Metaphase and Anaphase	0.000449944	0.0101258	0.392118	1.64071	1	220	MAD2L1, NSL1, CENPQ, PSMC5, CC2D1B, UBE2E1, CENPF, NUP37, PSMB4, VRK2, BUB1B, CHMP4A, CHMP2A, ZWILCH, CDC26, CENPE, RPS27A, PSMC2, CHMP2B, CENPM, INCENP, DYNC1LI1, KNL1, PSMB3, NUDC, PSMA7, PSMA4, PSMD10, PSMC1, DYNC1I2, NUP54, EMD, ZWINT, LMNB1, SUMO1, CDK1, NDC80, CDCA5, SMC1A, SIRT2, UBB, SMC3, PSMD14, SKA1, NUF2, DYNC1LI2, MAPRE1, SPC24, CHMP3, PSMB8, NUP155, ANAPC4, SKA2, PSMA3, CENPI, PSMD7…
Mitotic Anaphase	0.000450349	0.0101258	0.393431	1.6451	1	219	MAD2L1, NSL1, CENPQ, PSMC5, CC2D1B, UBE2E1, CENPF, NUP37, PSMB4, VRK2, BUB1B, CHMP4A, CHMP2A, ZWILCH, CDC26, CENPE, RPS27A, PSMC2, CHMP2B, CENPM, INCENP, DYNC1LI1, KNL1, PSMB3, NUDC, PSMA7, PSMA4, PSMD10, PSMC1, DYNC1I2, NUP54, EMD, ZWINT, LMNB1, SUMO1, CDK1, NDC80, CDCA5, SMC1A, SIRT2, UBB, SMC3, PSMD14, SKA1, NUF2, DYNC1LI2, MAPRE1, SPC24, CHMP3, PSMB8, NUP155, ANAPC4, SKA2, PSMA3, CENPI, PSMD7…
MyD88 deficiency (TLR2/4)	0.000605205	0.0131008	0.764289	1.87142	2	13	HMGB1, S100A9, BTK, S100A8, TLR4, LY96, CD14, TLR1, TLR2, MYD88, TLR6
Pyroptosis	0.000622278	0.0131008	0.696918	1.9861	2	24	HMGB1, CHMP4A, CHMP2A, CASP4, CASP1, ELANE, IL18, BAX, CHMP2B, GSDMD, IL1A, CHMP3, CASP5
Viral mRNA Translation	0.000643915	0.0131008	0.47476	1.75826	2	87	RPS24, RPL6, RPL30, RPL12, RPL11, RPL26L1, RPS27A, RPL22L1, RPS8, RPL39L, RPL17, RPS7, RPL28, RPL10A, GRSF1, RPL23, RPL7, RPL41, RPLP2, RPL22, RPS4Y1, RPL21, RPS20, RPL24, RPS27, RPL35A, RPS17, RPL23A, RPL36A, RPS12, RPL4, RPS19, RPL14, RPL37, RPL39, RPS25, FAU, RPLP0, RPS3, RPS9, RPL36, RPL35, RPL13A
Eukaryotic Translation Elongation	0.000647249	0.0131008	0.46944	1.74392	2	90	RPS24, RPL6, RPL30, RPL12, RPL11, RPL26L1, RPS27A, RPL22L1, RPS8, RPL39L, RPL17, RPS7, RPL28, RPL10A, RPL23, RPL7, RPL41, RPLP2, RPL22, RPS4Y1, RPL21, RPS20, RPL24, RPS27, RPL35A, RPS17, RPL23A, RPL36A, RPS12, RPL4, RPS19, RPL14, RPL37, RPL39, RPS25, FAU, RPLP0, RPS3, EEF1D, RPS9, RPL36, RPL35, RPL13A, EEF1A1, RPS23, RPL36AL
Selenoamino acid metabolism	0.000652316	0.0131008	0.462271	1.74668	2	102	RPS24, HNMT, RPL6, RPL30, RPL12, RPL11, RPL26L1, AIMP1, CTH, RPS27A, RPL22L1, SEPSECS, RPS8, RPL39L, RPL17, RPS7, RPL28, RPL10A, RPL23, RPL7, RPL41, RPLP2, RPL22, RPS4Y1, RPL21, RPS20, RPL24, RPS27, RPL35A, SEPHS2, RPS17, RPL23A, RPL36A, RPS12, AHCY, RPL4, RPS19
DNA Replication	0.000659051	0.0131008	0.437139	1.7027	2	126	CDC7, PSMC5, UBE2E1, PSMB4, MCM8, CDK2, RFC4, CDC26, RBX1, RPS27A, SKP2, PSMC2, MCM7, POLD3, CDC45, MCM2, PRIM1, PSMB3, PSMA7, PSMA4, PSMD10, PSMC1, RFC1, RFC3, CUL1, UBB, PSMD14, MCM6, ORC6, PSMB8, RFC2, ANAPC4, CCNE1, MCM4, PSMA3, HIST1H3G, PSMD7, GINS1, UBE2C, PSMC3, DNA2, ANAPC10, PSMB1, CDC23, RPA1, KPNB1, CDT1, POLA2, CCNA2, PCNA, PSMD13, RPA2, LIG1, PSMD4, MCM10, PSME1, ANAPC2, PSME2, MCM5…
G1/S Transition	0.000660647	0.0131008	0.438441	1.71305	2	129	CDC7, CDK7, PSMC5, PSMB4, MCM8, CDK2, RPS27A, RB1, SKP2, PSMC2, TFDP1, MCM7, CDC45, CDKN1B, MCM2, LIN9, PRIM1, CKS1B, PSMB3, PSMA7, PSMA4, PSMD10, PSMC1, CUL1, CDK1, UBB, PSMD14, LIN52, MCM6, TK1, CABLES1, ORC6, AKT3, CDK4, TYMS, PSMB8, AKT1, CCNE1, MCM4, PSMA3, PSMD7, WEE1, PSMC3, PSMB1, RPA1, CDT1, POLA2, CCNA2, PCNA, PSMD13, RPA2, PSMD4, MCM10, PSME1, LIN54, PSME2, PTK6, MCM5
Cellular response to starvation	0.000661521	0.0131008	0.418648	1.67374	2	150	LAMTOR5, RPS24, ATP6V1G1, ATP6V1C1, RPL6, RPL30, RPL12, RPL11, EIF2S2, RPL26L1, RRAGC, BMT2, RPS27A, RRAGD, LAMTOR4, RPL22L1, LAMTOR3, ATP6V0B, RPS8, RPL39L, RPL17, RPS7, EIF2S1, RPL28, RPL10A, RPL23, MIOS, RPL7, RPL41, ATP6V1D, LAMTOR1, EIF2AK4, RPLP2, RPL22, RPS4Y1, RPL21, RPS20, RPL24, ATF2, IMPACT, RPS27, RPL35A, SH3BP4, RPS17, RPL23A, RPL36A, RPS12
Protein localization	0.000668003	0.0131008	0.412287	1.642	2	148	DDO, PRNP, SCP2, COQ2, ACBD5, GSTK1, PAOX, DHRS4, ACAA1, AGPS, SEC61B, HSCB, EHHADH, GNPAT, TOMM20, RPS27A, TIMM8A, PHYH, HMOX1, HMGCL, TIMM9, BCS1L, ATAD1, CHCHD10, PXMP2, COA4, EMD, TIMM10, PIPOX, UBB, FIS1, NUDT7, CAMLG, CROT, PEX7, TIMM13, FXN, TIMM17A, ACOT8, PEX16, GDAP1, TOMM70, TIMM8B, HACL1, CAT, TIMM21, CHCHD7
Signaling by ROBO receptors	0.000673703	0.0131008	0.391426	1.61584	2	194	RPS24, SRGAP2, UPF3A, PSMC5, MAGOH, SLIT2, NCBP2, PSMB4, RPL6, RPL30, RPL12, RPL11, RPL26L1, RBX1, RPS27A, PSMC2, PAK1, RPL22L1, ETF1, PSMB3, PSMA7, PSMA4, PSMD10, PSMC1, CASC3, NCK1, NCK2, RPS8, RPL39L, UBB, PSMD14, RPL17, ROBO1, RPS7, RPL28, PRKACB, RPL10A, MYO9B, LDB1, RPL23, RPL7, RPL41, PSMB8, MAGOHB, RPLP2, RPL22, RPS4Y1, PSMA3, PRKACA, RPL21, RPS20, RAC1, RPL24, PSMD7, EIF4A3, RPS27, RPL35…
ECM proteoglycans	0.00076147	0.0145185	-0.585099	-1.85444	3	42	TNC, ITGA7, ITGB3, COL6A2, SERPINE1, LAMA2, COL6A1, SPARC, DAG1, NCAM1, COL5A1, APP, HSPG2, COL5A3, ITGAX, COL6A3, TGFB1
FASTK family proteins regulate processing and stability of mitochondrial RNAs	0.000779727	0.0145185	-0.70506	-1.87217	3	19	MT-ATP6, MT-RNR2, MT-CO1, MT-RNR1, MT-CO2, MT-ND4L, MT-ND1, MT-ATP8, MT-CYB, MT-ND2, MT-ND4, MT-ND3
Defective B3GALT6 causes EDSP2 and SEMDJL1	0.000807428	0.0145185	-0.803351	-1.84821	3	11	CSPG4, GPC4, SDC2, HSPG2, GPC1
IRAK4 deficiency (TLR2/4)	0.000812018	0.0145185	0.766882	1.91061	3	14	HMGB1, S100A9, BTK, S100A8, TLR4, LY96, CD14, IRAK4, TLR1, TLR2, MYD88, TLR6
Signaling by CSF3 (G-CSF)	0.000835247	0.0145185	0.640132	1.87302	3	27	GAB2, CSF3R, SYK, HCK, GRB2, RPS27A, JAK2, LYN, UBB, TYK2, STAT5A, CUL5, KRAS, SHC1
mRNA Splicing - Minor Pathway	0.000842105	0.0145185	0.544273	1.83524	3	52	POLR2E, NCBP2, SNRPF, SNRNP25, ZCRB1, DDX42, POLR2G, SNRNP35, SNRPD3, SRSF7, YBX1, SRSF1, SRSF6, POLR2B, SF3B6, SNRPD1, TXNL4A, SF3B1, POLR2K, SRSF2, SNRPE, SNRPG, SF3B5
RNA Polymerase II Transcription Termination	0.000851426	0.0145185	0.511468	1.80281	3	66	ALYREF, THOC7, MAGOH, NCBP2, SNRPF, PABPN1, THOC6, CDC40, SNRPD3, LSM10, SRSF7, CPSF4, SRSF5, CASC3, DDX39B, SRSF1, CPSF1, DHX38, SRSF6, SLBP, CSTF2T, DDX39A, MAGOHB, PCF11, SYMPK, SRSF9, SRSF2, SNRPE, THOC1, SNRPG, EIF4A3
Activation of APC/C and APC/C:Cdc20 mediated degradation of mitotic proteins	0.000855981	0.0145185	0.481103	1.73128	3	74	MAD2L1, PSMC5, UBE2E1, PSMB4, BUB1B, CDC26, RPS27A, PSMC2, PSMB3, PSMA7, PSMA4, PSMD10, PSMC1, CDK1, UBB, PSMD14, NEK2, PSMB8, ANAPC4, PSMA3, PSMD7, UBE2C, PSMC3, ANAPC10, PSMB1, CDC23, PTTG1, CCNA2, PSMD13, PSMD4, PSME1, ANAPC2, PSME2, PSMC6, CDC20, UBE2S, ANAPC16, PSMA6
Peptide chain elongation	0.000858553	0.0145185	0.470787	1.74355	3	87	RPS24, RPL6, RPL30, RPL12, RPL11, RPL26L1, RPS27A, RPL22L1, RPS8, RPL39L, RPL17, RPS7, RPL28, RPL10A, RPL23, RPL7, RPL41, RPLP2, RPL22, RPS4Y1, RPL21, RPS20, RPL24, RPS27, RPL35A, RPS17, RPL23A, RPL36A, RPS12, RPL4, RPS19, RPL14, RPL37, RPL39, RPS25, FAU, RPLP0, RPS3, RPS9, RPL36, RPL35, RPL13A, EEF1A1, RPS23, RPL36AL
Switching of origins to a post-replicative state	0.000858738	0.0145185	0.466244	1.73239	3	89	PSMC5, UBE2E1, PSMB4, MCM8, CDK2, CDC26, RBX1, RPS27A, SKP2, PSMC2, MCM7, MCM2, PSMB3, PSMA7, PSMA4, PSMD10, PSMC1, CUL1, UBB, PSMD14, MCM6, ORC6, PSMB8, ANAPC4, CCNE1, MCM4, PSMA3, PSMD7, UBE2C, PSMC3, ANAPC10, PSMB1, CDC23, CDT1, CCNA2, PSMD13, PSMD4, PSME1, ANAPC2, PSME2, MCM5, PSMC6, FZR1, UBE2S, ANAPC16, PSMA6
Nonsense Mediated Decay (NMD) independent of the Exon Junction Complex (EJC)	0.000862441	0.0145185	0.460388	1.71885	3	93	RPS24, NCBP2, RPL6, RPL30, RPL12, RPL11, RPL26L1, RPS27A, RPL22L1, ETF1, RPS8, RPL39L, RPL17, RPS7, RPL28, RPL10A, RPL23, RPL7, RPL41, RPLP2, RPL22, RPS4Y1, RPL21, RPS20, RPL24, RPS27, RPL35A, RPS17, RPL23A, RPL36A, RPS12, RPL4, RPS19, GSPT2, RPL14, RPL37, RPL39, RPS25, FAU, RPLP0, RPS3, RPS9, RPL36, RPL35, RPL13A
Respiratory electron transport	0.000870322	0.0145185	0.437355	1.67657	3	112	COX6A1, COX8A, NDUFS3, ETFA, NDUFB3, COX7B, SCO2, NDUFA1, SDHD, UQCRC2, NDUFA4, NDUFV3, NDUFS2, NDUFA10, SURF1, NDUFAF6, GOT1, TMEM126B, NDUFS7, NDUFA2, NDUFA5, NDUFS6, NDUFS5, ETFDH, COX18, ACAD9, NDUFB2, COQ10B, ETFB, COX5A, NDUFB1, TACO1, COX4I1, NDUFAF2, COX6C, NDUFA8, COX14, NDUFAB1, TMEM186, TIMMDC1, COQ10A, NDUFS4, SDHB, CYCS, NDUFV2, COX7C, NDUFB4, UQCRQ, NDUFA6, NDUFAF1, MDH1, NDUFA13, E…
G2/M Checkpoints	0.00087777	0.0145185	0.420673	1.64346	3	128	CDC7, RBBP8, PSMC5, PSMB4, MCM8, BLM, CDK2, RFC4, MRE11, ATRIP, RPS27A, RAD17, PSMC2, MCM7, CDC45, YWHAE, BRIP1, MCM2, PSMB3, RMI2, PSMA7, PSMA4, PSMD10, PSMC1, RFC3, CDK1, UBB, RAD50, PSMD14, NBN, MCM6, CHEK2, UBE2V2, ORC6, PSMB8, RFC2, RHNO1, TOPBP1, MCM4, PSMA3, PSMD7, KAT5, WEE1, PSMC3, CLSPN, DNA2, PSMB1, RPA1, HUS1, GTSE1, PSMD13, CCNB2, RPA2, PSMD4, MCM10, PSME1
Separation of Sister Chromatids	0.00089226	0.0145905	0.394952	1.61254	3	176	MAD2L1, NSL1, CENPQ, PSMC5, UBE2E1, CENPF, NUP37, PSMB4, BUB1B, ZWILCH, CDC26, CENPE, RPS27A, PSMC2, CENPM, INCENP, DYNC1LI1, KNL1, PSMB3, NUDC, PSMA7, PSMA4, PSMD10, PSMC1, DYNC1I2, ZWINT, NDC80, CDCA5, SMC1A, UBB, SMC3, PSMD14, SKA1, NUF2, DYNC1LI2, MAPRE1, SPC24, PSMB8, ANAPC4, SKA2, PSMA3, CENPI, PSMD7, MAD1L1, CDCA8, WAPL, RPS27, PAFAH1B1, UBE2C, NUP107, PSMC3, NUP133, DSN1, ANAPC10, SGO2, P…
Asparagine N-linked glycosylation	0.000910954	0.0147288	0.346049	1.48092	3	266	ASGR2, CAPZA2, MANEA, OS9, CTSC, FUOM, GMPPA, TRAPPC10, DERL2, DCTN6, ASGR1, UBXN1, CHST10, B4GALT6, NAPA, ARF5, RPS27A, ACTR10, AMDHD2, RENBP, RNF185, B4GALT2, NEU3, ALG14, CTSZ, DPM1, CD59, COPZ2, SEC22B, SEC22C, DYNC1LI1, TRAPPC6A, NANS, COPG2, NPL, PSMC1, DYNC1I2, ST6GALNAC3, MIA3, ST8SIA6, MAN1B1, COPE, GOLGA2, MGAT3, DPM3, CMAS, UBB, FUCA1, TMED9, NAGK, DYNC1LI2, ARFGAP2, DCTN3, CTSA, PDIA3…
Integrin cell surface interactions	0.000947508	0.0151496	-0.537612	-1.82372	4	60	TNC, JAM2, COL8A2, ITGA7, ITGB3, ITGA5, ITGA6, COL6A2, CD44, VWF, COL6A1, ITGA10, ITGA11, COL18A1, SPP1, COL5A1, ITGA1, HSPG2, COL5A3, ITGAX, COL6A3, ITGB7, ICAM5
Negative regulation of NOTCH4 signaling	0.00105619	0.0164008	0.530075	1.79371	4	53	PSMC5, PSMB4, RBX1, RPS27A, PSMC2, NOTCH4, PSMB3, PSMA7, PSMA4, PSMD10, PSMC1, CUL1, FBXW7, UBB, PSMD14, PSMB8, AKT1, PSMA3, PSMD7, PSMC3, PSMB1, TACC3, PSMD13, PSMD4, PSME1, PSME2, PSMC6
APC:Cdc20 mediated degradation of cell cycle proteins prior to satisfation of the cell cycle checkpoint	0.00106769	0.0164008	0.485202	1.73235	4	71	MAD2L1, PSMC5, UBE2E1, PSMB4, BUB1B, CDC26, RPS27A, PSMC2, PSMB3, PSMA7, PSMA4, PSMD10, PSMC1, CDK1, UBB, PSMD14, NEK2, PSMB8, ANAPC4, PSMA3, PSMD7, UBE2C, PSMC3, ANAPC10, PSMB1, CDC23, CCNA2, PSMD13, PSMD4, PSME1, ANAPC2, PSME2, PSMC6, CDC20, UBE2S, ANAPC16, PSMA6
APC/C:Cdc20 mediated degradation of mitotic proteins	0.00107066	0.0164008	0.482696	1.73214	4	73	MAD2L1, PSMC5, UBE2E1, PSMB4, BUB1B, CDC26, RPS27A, PSMC2, PSMB3, PSMA7, PSMA4, PSMD10, PSMC1, CDK1, UBB, PSMD14, NEK2, PSMB8, ANAPC4, PSMA3, PSMD7, UBE2C, PSMC3, ANAPC10, PSMB1, CDC23, PTTG1, CCNA2, PSMD13, PSMD4, PSME1, ANAPC2, PSME2, PSMC6, CDC20, UBE2S, ANAPC16, PSMA6
Protein folding	0.00107135	0.0164008	0.468512	1.693	4	76	GNB4, TBCB, FBXL3, GNG12, CCT6B, PFDN1, AP3M1, KIF13A, CCT6A, GNA15, PFDN2, PDCL, FBXW7, PFDN5, GNB1, FBXO4, HDAC3, ARL2, CCNE1, FBXW9, FBXW5, VBP1, TBCC, GNG7, KIFC3, NOP56, TBCE
Rab regulation of trafficking	0.00109266	0.0165047	0.421109	1.63266	4	121	RAB12, RAB5A, ANKRD27, RABEP1, TRAPPC10, TBC1D13, GGA2, HPS1, TBC1D17, RAB5C, HPS4, TRAPPC11, POLG, RIN2, RAB8A, TRAPPC8, TRAPPC6A, YWHAE, DENND5A, RAB11A, ARF6, CHML, MON1A, RAB31, RAB3GAP2, RAB33B, AKT3, RAB10, AKT1, RAB35, SYTL1, ULK1, RINL, TBC1D16, RAB9A, TRAPPC2, ALS2CL, MON1B, RIC1, RAB32, RAB11B, SBF2, RAB18, RABGAP1, DENND6A, TBC1D14, TRAPPC6B, GGA1, GGA3, DENND6B, RAB8B, OPTN, RAB4A, TR…
Interleukin-1 family signaling	0.00110108	0.0165047	0.397584	1.56331	4	134	HMGB1, IKBKG, CASP8, PSMC5, IRAK1, NOD1, PSMB4, CHUK, ALOX5, NOD2, CASP1, IRAK3, S100A12, RBX1, TBK1, IKBKB, RPS27A, IL18, IL1RL1, PSMC2, PTPN9, IRAK4, TAB3, IL1R1, PSMB3, PSMA7, PSMA4, PSMD10, PSMC1, CUL1, PTPN18, GSDMD, UBB, PSMD14, IL1A, PTPN2, NKIRAS2
DNA Repair	0.00115447	0.017018	0.339885	1.45717	4	273	POLR2E, CDK7, RBBP8, NEIL2, INO80E, CUL4A, FANCC, ACTR8, SUMO3, ACTR5, UBXN1, POLR2G, PPP4C, MBD4, BLM, XAB2, CDK2, MCRS1, RFC4, LIG4, SUMO2, MRE11, ATRIP, RBX1, GEN1, RPS27A, ASCC1, PNKP, RAD17, DDB2, RAD51AP1, PMS2, POLD3, MAD2L2, BRIP1, FANCI, GTF2H2, RMI2, COPS8, KDM4A, RFC1, RFC3, FANCD2, MUS81, PARP1, MPG, SUMO1, POLR2B, ACTL6A, COPS7B, USP1, PIAS1, UBB, RAD50, ISY1, COPS5, POLQ, POLM, COPS…
Transcriptional Regulation by NPAS4	0.00115897	0.017018	-0.649469	-1.83972	5	25	GEM, TNRC6B, ARNTL, AGO2, NR3C1, CDK5, CREBBP, AGO3, TNRC6C, REST
Defective CFTR causes cystic fibrosis	0.00127146	0.0184811	0.511865	1.75786	5	57	OS9, PSMC5, PSMB4, DERL2, ERLIN2, RPS27A, PSMC2, RNF185, PSMB3, PSMA7, PSMA4, PSMD10, PSMC1, DERL3, UBB, PSMD14, PSMB8, PSMA3, PSMD7, PSMC3, PSMB1, ERLEC1, ERLIN1, PSMD13, PSMD4, PSME1
Respiratory electron transport, ATP synthesis by chemiosmotic coupling, and heat production by uncoupling proteins.	0.00130833	0.0188269	0.412746	1.59557	5	118	UCP2, COX6A1, COX8A, NDUFS3, ETFA, NDUFB3, COX7B, SCO2, NDUFA1, SDHD, UQCRC2, NDUFA4, NDUFV3, NDUFS2, NDUFA10, SURF1, NDUFAF6, GOT1, TMEM126B, NDUFS7, NDUFA2, NDUFA5, NDUFS6, NDUFS5, ETFDH, COX18, ACAD9, NDUFB2, COQ10B, ETFB, COX5A, NDUFB1, TACO1, COX4I1, NDUFAF2, COX6C, NDUFA8, COX14, NDUFAB1, TMEM186, TIMMDC1, COQ10A, NDUFS4, SDHB, CYCS, NDUFV2, COX7C, NDUFB4, UQCRQ, NDUFA6, NDUFAF1, MDH1, NDUF…
NoRC negatively regulates rRNA expression	0.00146689	0.020874	0.53188	1.72687	6	43	POLR2E, CDK7, SAP30BP, SIN3B, SUDS3, TAF1D, SAP30L, TAF1A, GTF2H2, TAF1C, POLR1D, POLR1C, POLR2K, HIST1H3G, GTF2H5, MBD2, GTF2H3, TTF1
Cytosolic sensors of pathogen-associated DNA	0.0014796	0.020874	0.504416	1.74264	6	59	POLR2E, IKBKG, CHUK, DTX4, MRE11, TBK1, IKBKB, RPS27A, TRIM32, CTNNB1, TRIM56, POLR1D, POLR1C, IFI16, STAT6, UBB, NKIRAS2, RIPK3, POLR2K, MYD88, POLR3G, IRF3
Orc1 removal from chromatin	0.00150086	0.0209683	0.487528	1.72525	6	68	PSMC5, PSMB4, MCM8, CDK2, RBX1, RPS27A, SKP2, PSMC2, MCM7, MCM2, PSMB3, PSMA7, PSMA4, PSMD10, PSMC1, CUL1, UBB, PSMD14, MCM6, ORC6, PSMB8, MCM4, PSMA3, PSMD7, PSMC3, PSMB1, CDT1, CCNA2, PSMD13, PSMD4, PSME1, PSME2, MCM5, PSMC6
Aerobic respiration and respiratory electron transport	0.00155937	0.0215762	0.371508	1.53438	6	192	PDHB, UCP2, COX6A1, PDPR, COX8A, NDUFS3, ETFA, NDUFB3, COX7B, SCO2, NDUFA1, SDHD, UQCRC2, NDUFA4, NDUFV3, NDUFS2, RPS27A, NDUFA10, SURF1, NDUFAF6, GOT1, SUCLA2, TMEM126B, PDHA1, NDUFS7, NDUFA2, IDH2, NDUFA5, NDUFS6, NDUFS5, ETFDH, COX18, ACAD9, NDUFB2, L2HGDH, GLO1, MRPS36, UBB, COQ10B, ETFB, LDHB, FH, COX5A, FXN, NDUFB1, TACO1, ISCA2, COX4I1, NDUFAF2, COX6C, RMND5B, NDUFA8, COX14, IDH3B, NDUFAB1…
Nucleotide-like (purinergic) receptors	0.00159649	0.0218795	0.7637	1.83126	7	12	P2RY1, P2RY13, P2RY12, LPAR6, P2RY2, P2RY14, P2RY6, ADORA2A, P2RY11
ABC transporter disorders	0.00170285	0.0224032	0.488258	1.721	7	66	OS9, PSMC5, PSMB4, DERL2, ERLIN2, RPS27A, PSMC2, RNF185, PSMB3, PSMA7, PSMA4, PSMD10, PSMC1, ABCD4, DERL3, UBB, PSMD14, PSMB8, PSMA3, PSMD7, PSMC3, PSMB1, ERLEC1, ABCA1, ABCB6, ERLIN1, PSMD13, PSMD4, PSME1
Cdc20:Phospho-APC/C mediated degradation of Cyclin A	0.00171343	0.0224032	0.481577	1.71325	7	70	MAD2L1, PSMC5, UBE2E1, PSMB4, BUB1B, CDC26, RPS27A, PSMC2, PSMB3, PSMA7, PSMA4, PSMD10, PSMC1, CDK1, UBB, PSMD14, PSMB8, ANAPC4, PSMA3, PSMD7, UBE2C, PSMC3, ANAPC10, PSMB1, CDC23, CCNA2, PSMD13, PSMD4, PSME1, ANAPC2, PSME2, PSMC6, CDC20, UBE2S, ANAPC16, PSMA6
trans-Golgi Network Vesicle Budding	0.00171527	0.0224032	0.483227	1.71003	7	68	AP3S1, CLINT1, AP1S2, CHMP2A, TXNDC5, TPD52, NAPA, CLTB, SNX2, RAB5C, OCRL, STX4, BLOC1S6, CTSZ, DTNBP1, ACBD3, AP1G2, SNAPIN, FTL, VAMP8, BLOC1S1, SNX5, AP1B1
DNA Replication Pre-Initiation	0.00174292	0.0224032	0.444061	1.67319	7	100	CDC7, PSMC5, UBE2E1, PSMB4, MCM8, CDK2, CDC26, RPS27A, PSMC2, MCM7, CDC45, MCM2, PRIM1, PSMB3, PSMA7, PSMA4, PSMD10, PSMC1, UBB, PSMD14, MCM6, ORC6, PSMB8, ANAPC4, MCM4, PSMA3, HIST1H3G, PSMD7, UBE2C, PSMC3, ANAPC10, PSMB1, CDC23, RPA1, KPNB1, CDT1, POLA2, PSMD13, RPA2, PSMD4, MCM10, PSME1, ANAPC2, PSME2, MCM5, PSMC6, FZR1, UBE2S, ANAPC16, PSMA6
Nonsense Mediated Decay (NMD) enhanced by the Exon Junction Complex (EJC)	0.0017433	0.0224032	0.412794	1.58494	7	113	PNRC2, RPS24, UPF3A, MAGOH, NCBP2, RPL6, RPL30, RPL12, RPL11, RPL26L1, RPS27A, RPL22L1, ETF1, CASC3, RPS8, RPL39L, RPL17, RPS7, RPL28, RPL10A, RPL23, RPL7, RPL41, MAGOHB, RPLP2, RPL22, RPS4Y1, RPL21, RPS20, RPL24, EIF4A3, RPS27, RPL35A, RPS17, RPL23A, RPL36A, RPS12, RPL4, RPS19
Nonsense-Mediated Decay (NMD)	0.0017433	0.0224032	0.412794	1.58494	7	113	PNRC2, RPS24, UPF3A, MAGOH, NCBP2, RPL6, RPL30, RPL12, RPL11, RPL26L1, RPS27A, RPL22L1, ETF1, CASC3, RPS8, RPL39L, RPL17, RPS7, RPL28, RPL10A, RPL23, RPL7, RPL41, MAGOHB, RPLP2, RPL22, RPS4Y1, RPL21, RPS20, RPL24, EIF4A3, RPS27, RPL35A, RPS17, RPL23A, RPL36A, RPS12, RPL4, RPS19
MHC class II antigen presentation	0.00174368	0.0224032	0.422107	1.60817	7	107	CTSO, DNM1, CAPZA2, HLA-DQB2, CTSC, HLA-DOB, KIF11, DCTN6, AP1S2, CENPE, HLA-DOA, KIF5B, ACTR10, OSBPL1A, DYNC1LI1, LGMN, KIF23, DYNC1I2, HLA-DMB, KIF22, CTSS, AP1B1, CTSH, IFI30, HLA-DQA2, DYNC1LI2, CTSL, DCTN3, AP2A2, CTSD, CTSA
Cyclin A:Cdk2-associated events at S phase entry	0.00192596	0.0245261	0.449983	1.65639	8	84	CDK7, PSMC5, PSMB4, CDK2, RPS27A, RB1, SKP2, PSMC2, TFDP1, CDKN1B, LIN9, CKS1B, PSMB3, PSMA7, PSMA4, PSMD10, PSMC1, CUL1, UBB, PSMD14, LIN52, CABLES1, AKT3, CDK4, PSMB8, AKT1, CCNE1, PSMA3, PSMD7, WEE1, PSMC3, PSMB1, CCNA2, PSMD13, PSMD4, PSME1, LIN54, PSME2, PTK6, PSMC6, FZR1, PSMA6, LIN37
Macroautophagy	0.00196164	0.0247559	0.40251	1.55809	8	119	LAMTOR5, MTERF3, PRKAB1, CHMP4A, CHMP2A, RRAGC, ATG4C, TOMM20, RPS27A, CHMP2B, ATG5, RRAGD, FUNDC1, LAMTOR4, DYNC1LI1, IFT88, ATG3, LAMTOR3, PARK7, DYNC1I2, PRKAA1, UVRAG, UBB, PRKAG1, BECN1, DYNC1LI2, WIPI1, ATG12, MTMR14, CHMP3, WDR45, LAMTOR1, ULK1, TOMM70, ATG16L1, PLIN2
Toll-like Receptor Cascades	0.00198719	0.0247559	0.385744	1.5475	8	153	DNM1, HMGB1, S100A9, IKBKG, CASP8, UNC93B1, BTK, S100A8, IRAK1, TLR10, MAPK11, NOD1, CHUK, TLR4, NOD2, MEF2C, IRAK3, LY96, S100A12, MAPK3, TBK1, CD14, IKBKB, RPS27A, CNPY3, IRAK4, TAB3, LGMN, CUL1, GSDMD, ATF1, LY86, UBB, BPI, CTSS, NKIRAS2, CTSL, RIPK3, MAPK9, TLR1, DUSP4, TLR2, CTSB, DUSP3, MYD88, TLR6, IRF3, ATF2, MAP3K8
Regulation of innate immune responses to cytosolic DNA	0.00199561	0.0247559	0.756735	1.81456	9	12	DTX4, TBK1, RPS27A, TRIM32, TRIM56, UBB, IRF3
Programmed Cell Death	0.00201703	0.0248078	0.370907	1.52795	8	190	HMGB2, HMGB1, DBNL, CASP8, PSMC5, PRKCD, PSMB4, UACA, TLR4, CHMP4A, CHMP2A, CASP4, CASP1, ELANE, LY96, MAPK3, CD14, RPS27A, APPL1, IL18, BAX, PSMC2, CHMP2B, TFDP1, PTK2, CTNNB1, BMF, YWHAE, TRADD, DAPK3, PSMB3, PSMA7, PSMA4, PSMD10, PSMC1, STUB1, LMNB1, BBC3, GSDMD, UBB, BAD, PSMD14, IL1A, APAF1, AKT3, RIPK3, CHMP3, PSMB8, AKT1, STK26, PSMA3, TNFSF10, CASP7, CASP5, PSMD7, AVEN, BIRC2
Impaired BRCA2 binding to RAD51	0.0021004	0.0255654	0.580131	1.78704	9	34	RBBP8, BLM, RFC4, MRE11, ATRIP, RAD17, BRIP1, RMI2, RFC3, RAD50, NBN, RFC2, RHNO1, TOPBP1, KAT5, DNA2, RPA1, HUS1, RPA2
Nucleotide-binding domain, leucine rich repeat containing receptor (NLR) signaling pathways	0.00211416	0.0255654	0.504826	1.72787	9	56	IKBKG, CASP8, MEFV, IRAK1, MAPK11, NOD1, CHUK, PYCARD, NOD2, CASP4, CASP1, IKBKB, RPS27A, HMOX1, CARD9, TAB3, TXNIP, TXN, UBB, PANX1, MAPK12
APC/C:Cdh1 mediated degradation of Cdc20 and other APC/C:Cdh1 targeted proteins in late mitosis/early G1	0.00213538	0.0256068	0.469657	1.67685	9	71	PSMC5, UBE2E1, PSMB4, CDC26, RPS27A, RB1, SKP2, PSMC2, PSMB3, PSMA7, PSMA4, PSMD10, PSMC1, UBB, PSMD14, PSMB8, ANAPC4, PSMA3, PSMD7, UBE2C, PSMC3, ANAPC10, PSMB1, CDC23, PTTG1, PSMD13, PSMD4, PSME1, ANAPC2, PSME2, PSMC6, FZR1, CDC20, UBE2S, ANAPC16, PSMA6
Assembly of collagen fibrils and other multimeric structures	0.00231571	0.0275397	-0.60451	-1.79334	11	31	COL8A2, BMP1, ITGA6, COL6A2, MMP9, MMP7, COL6A1, COL18A1, LAMB3, COL5A1, LOXL3, LOXL4, COL5A3, COL6A3
Cyclin E associated events during G1/S transition	0.0023595	0.0278305	0.454899	1.6674	10	82	CDK7, PSMC5, PSMB4, CDK2, RPS27A, RB1, SKP2, PSMC2, TFDP1, CDKN1B, LIN9, CKS1B, PSMB3, PSMA7, PSMA4, PSMD10, PSMC1, CUL1, UBB, PSMD14, LIN52, CABLES1, AKT3, CDK4, PSMB8, AKT1, CCNE1, PSMA3, PSMD7, WEE1, PSMC3, PSMB1, CCNA2, PSMD13, PSMD4, PSME1, LIN54, PSME2, PTK6, PSMC6
Defective B4GALT7 causes EDS, progeroid type	0.00242229	0.0283388	-0.782315	-1.79981	11	11	CSPG4, GPC4, SDC2, HSPG2, GPC1
TAK1-dependent IKK and NF-kappa-B activation	0.00251467	0.0290402	0.520033	1.68841	11	43	HMGB1, IKBKG, CASP8, IRAK1, NOD1, CHUK, NOD2, S100A12, IKBKB, RPS27A, TAB3
Diseases of DNA repair	0.0025226	0.0290402	0.505798	1.6909	11	50	RBBP8, BLM, RFC4, MRE11, ATRIP, RAD17, RAD51AP1, PMS2, BRIP1, RMI2, RFC3, RAD50, NEIL1, NBN, RFC2, RHNO1, TOPBP1, MSH2, KAT5, DNA2, RPA1, HUS1, RPA2
mRNA 3'-end processing	0.00254291	0.0290417	0.49463	1.69867	11	57	ALYREF, THOC7, MAGOH, NCBP2, PABPN1, THOC6, CDC40, SRSF7, CPSF4, SRSF5, CASC3, DDX39B, SRSF1, CPSF1, DHX38, SRSF6, CSTF2T, DDX39A, MAGOHB, PCF11, SYMPK, SRSF9, SRSF2, THOC1, EIF4A3
ABC-family proteins mediated transport	0.00257954	0.0291655	0.440548	1.63321	11	88	OS9, PSMC5, ABCC4, PSMB4, DERL2, ERLIN2, EIF2S2, ABCA7, RPS27A, PSMC2, RNF185, PSMB3, PSMA7, PSMA4, PSMD10, PSMC1, DERL3, UBB, PSMD14, EIF2S1, ABCB10, PSMB8, PSMA3, PSMD7, PSMC3, ABCC5, PSMB1, ERLEC1, ABCB6, ERLIN1, PSMD13, ABCA6, PSMD4, PSME1, ABCB7, PSME2, ABCG1
Regulation of TLR by endogenous ligand	0.00259429	0.0291655	0.747739	1.79298	12	12	HMGB1, S100A9, S100A8, TLR4, LY96, CD14, GSDMD, TLR1, TLR2, TLR6, TLR7
Antimicrobial peptides	0.00269263	0.0300364	0.616795	1.79424	12	26	S100A9, S100A8, DEFA3, CHGA, PGLYRP1, ELANE, CAMP, LCN2, CCR2, BPI, LTF, TLR1, ATOX1, TLR2, CD4
Autodegradation of Cdh1 by Cdh1:APC/C	0.00275365	0.0304808	0.483008	1.68763	12	63	PSMC5, UBE2E1, PSMB4, CDC26, RPS27A, PSMC2, PSMB3, PSMA7, PSMA4, PSMD10, PSMC1, UBB, PSMD14, PSMB8, ANAPC4, PSMA3, PSMD7, UBE2C, PSMC3, ANAPC10, PSMB1, CDC23, PSMD13, PSMD4, PSME1, ANAPC2, PSME2, PSMC6, FZR1, UBE2S, ANAPC16, PSMA6
Chromosome Maintenance	0.0027903	0.0306507	0.438788	1.62504	12	87	POLR2E, CENPQ, PIF1, POLR2G, BLM, CDK2, RFC4, MIS18A, NHP2, CENPM, POLD3, KNL1, PRIM1, CENPW, DKC1, RFC1, RFC3, HJURP, POLR2B, RBBP7, DSCC1, NPM1, GAR1, RFC2, MIS18BP1, POLR2K, CENPI, RTEL1, DNA2, RPA1, POLR2C, POLA2, CCNA2, PCNA, RPA2, LIG1
Regulation of mRNA stability by proteins that bind AU-rich elements	0.00299145	0.0326114	0.441162	1.62728	13	85	TNFSF13, PARN, EXOSC9, PSMC5, PRKCD, MAPK11, PSMB4, HNRNPD, EXOSC2, RPS27A, PSMC2, HSBP1, PSMB3, PSMA7, ZFP36, PSMA4, PSMD10, PSMC1, EXOSC8, UBB, PSMD14, ANP32A, PSMB8, AKT1, PSMA3, DIS3, PSMD7, DCP2, PSMC3, PSMB1, ZFP36L1, PSMD13, PSMD4, XRN1, EXOSC7, PSME1
Mitotic Spindle Checkpoint	0.00305144	0.0330152	0.411847	1.56908	13	107	MAD2L1, NSL1, CENPQ, UBE2E1, CENPF, NUP37, BUB1B, ZWILCH, CDC26, CENPE, CENPM, INCENP, DYNC1LI1, KNL1, NUDC, DYNC1I2, ZWINT, NDC80, SKA1, NUF2, DYNC1LI2, MAPRE1, SPC24, ANAPC4, SKA2, CENPI, MAD1L1, CDCA8, RPS27, PAFAH1B1, UBE2C, NUP107, NUP133, DSN1, ANAPC10, SGO2, CDC23, PPP1CC
Laminin interactions	0.00310378	0.0330446	-0.648455	-1.76412	15	21	ITGA7, ITGA6, LAMA2, COL18A1, LAMB3, ITGA1, HSPG2
ADORA2B mediated anti-inflammatory cytokines production	0.00311203	0.0330446	0.5805	1.75216	14	31	GNB4, ADCY7, GNG12, GNAI3, ADCY6, GNB1, PRKACB, PRKAR1B, PRKACA, ADCY9, GNAI2, IL6, GNG7
Glycosphingolipid catabolism	0.00312305	0.0330446	0.583417	1.73787	14	29	ARSA, GLB1L, ARSD, NEU3, ARSG, SMPD2, PSAP, ASAH1, SUMF1, ARSB, GALC, CTSA
Assembly of the pre-replicative complex	0.00320993	0.033716	0.437959	1.61213	14	84	PSMC5, UBE2E1, PSMB4, MCM8, CDC26, RPS27A, PSMC2, MCM7, MCM2, PSMB3, PSMA7, PSMA4, PSMD10, PSMC1, UBB, PSMD14, MCM6, ORC6, PSMB8, ANAPC4, MCM4, PSMA3, HIST1H3G, PSMD7, UBE2C, PSMC3, ANAPC10, PSMB1, CDC23, KPNB1, CDT1, PSMD13, PSMD4, PSME1, ANAPC2, PSME2, MCM5, PSMC6, FZR1, UBE2S, ANAPC16, PSMA6
Collagen formation	0.00342792	0.0357447	-0.527508	-1.70112	17	46	COL8A2, BMP1, ITGA6, COL6A2, MMP9, MMP7, COL6A1, COL18A1, LAMB3, COL5A1, LOXL3, LOXL4, SERPINH1, COL5A3, COL6A3, COL10A1, CD151, P4HA1
NOD1/2 Signaling Pathway	0.0037649	0.0385162	0.557266	1.73657	17	36	IKBKG, CASP8, IRAK1, MAPK11, NOD1, CHUK, NOD2, CASP4, CASP1, IKBKB, RPS27A, CARD9, TAB3
Negative epigenetic regulation of rRNA expression	0.00378868	0.0385162	0.508908	1.6703	17	46	POLR2E, CDK7, SAP30BP, SIN3B, SUDS3, TAF1D, SAP30L, TAF1A, GTF2H2, TAF1C, POLR1D, POLR1C, POLR2K, HIST1H3G, GTF2H5, MBD2, GTF2H3, TTF1
Defective EXT1 causes exostoses 1, TRPS2 and CHDS	0.00380076	0.0385162	-0.781389	-1.75931	18	10	GPC4, SDC2, HSPG2, GPC1
Defective EXT2 causes exostoses 2	0.00380076	0.0385162	-0.781389	-1.75931	18	10	GPC4, SDC2, HSPG2, GPC1
RNA Polymerase I Promoter Escape	0.00397739	0.0400242	0.584143	1.72207	18	28	CBX3, POLR2E, CDK7, TAF1D, TAF1A, GTF2H2, TAF1C, POLR1D, POLR1C, RRN3, POLR2K, HIST1H3G, GTF2H5, GTF2H3
Inactivation of CSF3 (G-CSF) signaling	0.00410678	0.0409732	0.633147	1.77377	19	22	CSF3R, SYK, HCK, RPS27A, JAK2, LYN, UBB, TYK2, STAT5A, CUL5
Response of EIF2AK4 (GCN2) to amino acid deficiency	0.00412864	0.0409732	0.410235	1.54323	18	99	RPS24, RPL6, RPL30, RPL12, RPL11, EIF2S2, RPL26L1, RPS27A, RPL22L1, RPS8, RPL39L, RPL17, RPS7, EIF2S1, RPL28, RPL10A, RPL23, RPL7, RPL41, EIF2AK4, RPLP2, RPL22, RPS4Y1, RPL21, RPS20, RPL24, ATF2, IMPACT, RPS27, RPL35A, RPS17, RPL23A, RPL36A, RPS12, RPL4, RPS19
Global Genome Nucleotide Excision Repair (GG-NER)	0.00427807	0.0421654	0.428961	1.57735	19	83	CDK7, INO80E, CUL4A, ACTR8, SUMO3, ACTR5, MCRS1, RFC4, SUMO2, RBX1, RPS27A, DDB2, POLD3, GTF2H2, COPS8, RFC1, RFC3, PARP1, SUMO1, ACTL6A, COPS7B, PIAS1, UBB, COPS5, COPS4, UBE2V2, TFPT, RFC2, GTF2H5, CUL4B, GTF2H3, POLK, ERCC5, RPA1, COPS7A, PARP2, PCNA, RPA2, LIG1
Golgi-to-ER retrograde transport	0.00437733	0.0428501	0.389888	1.50168	19	116	CAPZA2, KIF11, DCTN6, KIF13B, CENPE, NAPA, ARF5, KIF5B, ACTR10, USE1, GALNT1, PLA2G4A, COPZ2, SEC22B, DYNC1LI1, KIF23, COPG2, DYNC1I2, KIF1C, KIF22, COPE, TMED9, RAB3GAP2, DYNC1LI2, PLA2G6, ARFGAP2, DCTN3, COPB2
CDK-mediated phosphorylation and removal of Cdc6	0.00449775	0.0437315	0.454218	1.61592	20	70	PSMC5, UBE2E1, PSMB4, CDK2, CDC26, RPS27A, PSMC2, PSMB3, PSMA7, PSMA4, PSMD10, PSMC1, UBB, PSMD14, PSMB8, ANAPC4, CCNE1, PSMA3, PSMD7, UBE2C, PSMC3, ANAPC10, PSMB1, CDC23, CCNA2, PSMD13, PSMD4, PSME1, ANAPC2, PSME2, PSMC6, FZR1, UBE2S, ANAPC16, PSMA6
Nucleotide Excision Repair	0.00458015	0.0441811	0.39791	1.51353	20	106	POLR2E, CDK7, INO80E, CUL4A, ACTR8, SUMO3, ACTR5, POLR2G, XAB2, MCRS1, RFC4, SUMO2, RBX1, RPS27A, DDB2, POLD3, GTF2H2, COPS8, RFC1, RFC3, PARP1, SUMO1, POLR2B, ACTL6A, COPS7B, PIAS1, UBB, ISY1, COPS5, COPS4, UBE2V2, TFPT, RFC2, POLR2K, GTF2H5, CUL4B, GTF2H3, POLK, ERCC5, RPA1, COPS7A, PARP2, POLR2C, PCNA, RPA2, LIG1
Vasopressin regulates renal water homeostasis via Aquaporins	0.0046054	0.0441811	0.579296	1.70778	21	28	GNB4, ADCY7, GNG12, RAB11A, ADCY6, GNB1, PRKACB, AVPR2, PRKAR1B, PRKACA, ADCY9, GNG7
ADP signalling through P2Y purinoceptor 1	0.00467005	0.0445047	0.681204	1.75986	22	16	GNB4, P2RY1, GNG12, PLA2G4A, GNA15, GNB1
Glucagon signaling in metabolic regulation	0.0047452	0.0449233	0.628515	1.73772	22	21	GNB4, ADCY7, GNG12, ADCY6, GNB1, PRKACB, PRKAR1B, PRKACA, ADCY9, GNG7
Translesion synthesis by POLK	0.00488898	0.045982	0.663101	1.74281	23	17	RFC4, RPS27A, MAD2L2, RFC1, RFC3, UBB, RFC2, POLK, RPA1, PCNA, RPA2
Nuclear Receptor transcription pathway	0.00497989	0.0465329	-0.552757	-1.69444	25	36	NR4A3, RARG, RORC, NCOR1, NR3C2, NR4A2, NR3C1, THRB, VDR, NR4A1, PPARG, PPARD

## Sheet: Table S5
Table S5. Common responding pathways in control and PTSD on time 2 vs. time 1
	Control		PTSD
	padj	NES	padj.1	NES.1
Cell Cycle, Mitotic	0.000592203	-2.30116	0.00588069	-1.76417
SARS-CoV Infections	0.000592203	-2.26515	0.00570923	-1.77145
Diseases of signal transduction by growth factor receptors and second messengers	0.000592203	-2.11881	0.00570923	-1.42558
Class I MHC mediated antigen processing & presentation	0.000592203	-1.995	0.00553185	-1.51525
Transcriptional Regulation by TP53	0.000592203	-2.19978	0.0157794	-1.40645
M Phase	0.000592203	-2.17457	0.00553185	-1.79798
Metabolism of amino acids and derivatives	0.000592203	-2.46891	0.0125652	-1.45819
Processing of Capped Intron-Containing Pre-mRNA	0.000592203	-2.27275	0.00535064	-1.607
Antigen processing: Ubiquitination & Proteasome degradation	0.000592203	-1.94844	0.00535064	-1.59943
Translation	0.000592203	-2.89229	0.00877353	-1.5791
DNA Repair	0.000592203	-1.81072	0.0125462	-1.51722
Intracellular signaling by second messengers	0.000592203	-2.21115	0.00534938	-1.56427
SARS-CoV-2 Infection	0.000592203	-2.55186	0.00534938	-1.89322
Cell Cycle Checkpoints	0.000592203	-2.12379	0.00534938	-1.64568
Interferon Signaling	0.000592203	-2.33716	0.00848067	-1.55033
Deubiquitination	0.000592203	-2.11868	0.0168996	-1.48436
PIP3 activates AKT signaling	0.000592203	-2.23546	0.00528733	-1.62323
Mitotic Metaphase and Anaphase	0.000592203	-2.35008	0.00528733	-1.82509
Mitotic Anaphase	0.000592203	-2.34807	0.00528733	-1.81882
rRNA processing	0.000592203	-2.74918	0.00528733	-1.8833
HIV Infection	0.000592203	-2.62839	0.00528733	-1.75496
Neddylation	0.000592203	-2.16116	0.00528733	-1.6331
Signaling by ROBO receptors	0.000592203	-2.79089	0.00833478	-1.61096
rRNA processing in the nucleus and cytosol	0.000592203	-2.77747	0.00528733	-2.29639
Major pathway of rRNA processing in the nucleolus and cytosol	0.000592203	-2.75471	0.00528733	-2.31229
SARS-CoV-2-host interactions	0.000592203	-2.47846	0.00528733	-2.151
Separation of Sister Chromatids	0.000592203	-2.16809	0.00811125	-1.6056
SUMOylation	0.000592203	-1.84946	0.00528733	-1.97928
Regulation of expression of SLITs and ROBOs	0.000592203	-2.7961	0.00805615	-1.68941
S Phase	0.000592203	-2.24764	0.0134912	-1.582
SUMO E3 ligases SUMOylate target proteins	0.000592203	-1.81637	0.00528733	-1.92661
Regulation of TP53 Activity	0.000592203	-1.92033	0.0134912	-1.64781
Ub-specific processing proteases	0.000592203	-2.05753	0.0181629	-1.54735
Influenza Infection	0.000592203	-2.86392	0.00528733	-2.21351
Cellular response to starvation	0.000592203	-2.68186	0.0134912	-1.58011
Antiviral mechanism by IFN-stimulated genes	0.000592203	-2.43913	0.010699	-1.65152
HIV Life Cycle	0.000592203	-2.36616	0.010699	-1.69341
Disorders of transmembrane transporters	0.000592203	-2.27179	0.010699	-1.66669
SARS-CoV-1 Infection	0.000592203	-2.54117	0.00792471	-1.68217
PTEN Regulation	0.000592203	-2.19505	0.0178826	-1.57768
Influenza Viral RNA Transcription and Replication	0.000592203	-2.84151	0.00528733	-2.16707
G2/M Checkpoints	0.000592203	-2.13541	0.010699	-1.63797
Cellular Senescence	0.000592203	-1.86139	0.0292347	-1.52352
DNA Replication	0.000592203	-2.2872	0.0269143	-1.51438
Epigenetic regulation of gene expression	0.000592203	-1.70411	0.0178826	-1.60848
Host Interactions of HIV factors	0.000592203	-2.62564	0.00528733	-1.96884
Late Phase of HIV Life Cycle	0.000592203	-2.36797	0.0134115	-1.65614
Nonsense Mediated Decay (NMD) enhanced by the Exon Junction Complex (EJC)	0.000592203	-2.76507	0.00528733	-2.06639
Nonsense-Mediated Decay (NMD)	0.000592203	-2.76507	0.00528733	-2.06639
TCR signaling	0.000592203	-2.4054	0.0178826	-1.55388
L13a-mediated translational silencing of Ceruloplasmin expression	0.000592203	-2.86997	0.00528733	-2.1219
GTP hydrolysis and joining of the 60S ribosomal subunit	0.000592203	-2.86906	0.00528733	-2.09729
SRP-dependent cotranslational protein targeting to membrane	0.000592203	-2.75714	0.00528733	-1.83014
Resolution of Sister Chromatid Cohesion	0.000592203	-1.75545	0.010699	-1.65381
Cap-dependent Translation Initiation	0.000592203	-2.87286	0.00528733	-2.02562
Eukaryotic Translation Initiation	0.000592203	-2.87286	0.00528733	-2.02562
SARS-CoV-2 activates/modulates innate and adaptive immune responses	0.000592203	-2.09616	0.00528733	-1.91913
Mitotic Spindle Checkpoint	0.000592203	-1.73575	0.0427378	-1.48895
Selenoamino acid metabolism	0.000592203	-2.62902	0.00528733	-1.7451
Formation of a pool of free 40S subunits	0.000592203	-2.82821	0.00528733	-2.14079
Response of EIF2AK4 (GCN2) to amino acid deficiency	0.000592203	-2.76148	0.00528733	-1.94188
Downstream TCR signaling	0.000592203	-2.41656	0.0156273	-1.62718
Cellular response to heat stress	0.000592203	-2.41732	0.0132184	-1.65529
Eukaryotic Translation Termination	0.000592203	-2.78124	0.00528733	-2.04836
HCMV Infection	0.000592203	-2.36677	0.00528733	-1.90131
SARS-CoV-1-host interactions	0.000592203	-2.54582	0.00528733	-1.7674
Nonsense Mediated Decay (NMD) independent of the Exon Junction Complex (EJC)	0.000592203	-2.80795	0.00528733	-2.06037
Eukaryotic Translation Elongation	0.000592203	-2.7685	0.00528733	-2.05764
Selenocysteine synthesis	0.000592203	-2.67321	0.00528733	-1.85013
Switching of origins to a post-replicative state	0.000592203	-2.17032	0.0427378	-1.55229
Chromosome Maintenance	0.000592203	-1.83661	0.0461394	-1.54006
Peptide chain elongation	0.000592203	-2.76956	0.00528733	-2.00913
Viral mRNA Translation	0.000592203	-2.74491	0.00528733	-1.99581
Mitotic Prophase	0.000592203	-2.39657	0.00528733	-2.08552
Regulation of mRNA stability by proteins that bind AU-rich elements	0.000592203	-2.32089	0.0152895	-1.66328
Downstream signaling events of B Cell Receptor (BCR)	0.000592203	-2.34231	0.0427378	-1.58882
Assembly of the pre-replicative complex	0.000592203	-2.24463	0.0471927	-1.5527
Estrogen-dependent gene expression	0.000592203	-1.82175	0.0427378	-1.56136
Transport of Mature Transcript to Cytoplasm	0.000592203	-1.95715	0.00528733	-2.05964
Costimulation by the CD28 family	0.000592203	-2.06862	0.00754539	-1.79139
Glucose metabolism	0.000592203	-2.21045	0.0297072	-1.62895
ISG15 antiviral mechanism	0.000592203	-2.25704	0.00528733	-1.90618
Transport of Mature mRNA derived from an Intron-Containing Transcript	0.000592203	-1.89523	0.00528733	-2.04056
HCMV Early Events	0.000592203	-2.22979	0.00528733	-1.8146
Nuclear Envelope (NE) Reassembly	0.000592203	-2.47034	0.00528733	-1.91628
SLC transporter disorders	0.000592203	-1.75287	0.0128505	-1.70256
Gene Silencing by RNA	0.000592203	-2.0444	0.00528733	-1.7856
Glycolysis	0.000592203	-2.23501	0.0168996	-1.71952
Protein ubiquitination	0.000592203	-2.04754	0.0274615	-1.67083
Ribosomal scanning and start codon recognition	0.000592203	-2.62875	0.00528733	-2.08829
Translation initiation complex formation	0.000592203	-2.62698	0.00528733	-2.13054
Activation of the mRNA upon binding of the cap-binding complex and eIFs, and subsequent binding to 43S	0.000592203	-2.61669	0.00528733	-2.12978
rRNA modification in the nucleus and cytosol	0.000592203	-2.36055	0.00528733	-1.96032
SUMOylation of chromatin organization proteins	0.000592203	-1.95349	0.00528733	-2.01827
tRNA processing in the nucleus	0.000592203	-1.97769	0.00739006	-1.9259
HCMV Late Events	0.000592203	-2.25643	0.00528733	-2.09753
Metabolism of non-coding RNA	0.000592203	-2.15477	0.00528733	-2.32697
Nuclear Envelope Breakdown	0.000592203	-2.23683	0.00528733	-2.17626
snRNP Assembly	0.000592203	-2.15477	0.00528733	-2.32697
Formation of the ternary complex, and subsequently, the 43S complex	0.000592203	-2.56102	0.00528733	-2.20078
SARS-CoV-2 modulates host translation machinery	0.000592203	-2.30866	0.00528733	-2.04538
Transcriptional regulation by small RNAs	0.000592203	-2.20533	0.00528733	-2.04105
Transport of Mature mRNAs Derived from Intronless Transcripts	0.000592203	-2.10931	0.00528733	-2.07073
Viral Messenger RNA Synthesis	0.000592203	-2.20822	0.00528733	-2.02983
SUMOylation of RNA binding proteins	0.000592203	-2.143	0.00528733	-2.04409
SUMOylation of DNA replication proteins	0.000592203	-2.17106	0.00528733	-1.99906
Transport of Mature mRNA Derived from an Intronless Transcript	0.000592203	-2.08211	0.00528733	-2.04483
NS1 Mediated Effects on Host Pathways	0.000592203	-2.09642	0.00528733	-2.24264
Interactions of Rev with host cellular proteins	0.000592203	-2.24636	0.00528733	-2.17457
Interactions of Vpr with host cellular proteins	0.000592203	-2.09237	0.00528733	-2.06381
SARS-CoV-1 modulates host translation machinery	0.000592203	-2.33463	0.00528733	-1.88233
Nuclear import of Rev protein	0.000592203	-2.18032	0.00528733	-2.1339
Vpr-mediated nuclear import of PICs	0.000592203	-2.0234	0.00528733	-2.12729
Rev-mediated nuclear export of HIV RNA	0.000592203	-2.19072	0.00528733	-2.12021
SUMOylation of SUMOylation proteins	0.000592203	-2.12037	0.00528733	-1.95555
Transport of the SLBP independent Mature mRNA	0.000592203	-2.01927	0.00528733	-2.10957
Association of TriC/CCT with target proteins during biosynthesis	0.000592203	-2.25797	0.00528733	-2.03904
Nuclear Pore Complex (NPC) Disassembly	0.000592203	-2.03864	0.00528733	-2.09871
Transport of the SLBP Dependant Mature mRNA	0.000592203	-2.04425	0.00528733	-2.1343
Export of Viral Ribonucleoproteins from Nucleus	0.000592203	-2.05561	0.00528733	-2.0039
NEP/NS2 Interacts with the Cellular Export Machinery	0.000592203	-2.08957	0.00528733	-2.10943
Transport of Ribonucleoproteins into the Host Nucleus	0.000592203	-2.01927	0.00528733	-2.15874
G0 and Early G1	0.000592203	-1.96128	0.0159245	-1.87936
Postmitotic nuclear pore complex (NPC) reformation	0.000592203	-2.27358	0.0197617	-1.82625
Defective TPR may confer susceptibility towards thyroid papillary carcinoma (TPC)	0.000592203	-2.02378	0.00528733	-2.09967
Regulation of Glucokinase by Glucokinase Regulatory Protein	0.000592203	-2.02378	0.00528733	-2.09967
Constitutive Signaling by AKT1 E17K in Cancer	0.000592203	-1.92331	0.0437923	-1.76103
Class C/3 (Metabotropic glutamate/pheromone receptors)	0.000733182	2.13008	0.00528733	1.97759
Regulation of lipid metabolism by PPARalpha	0.00100256	-1.67554	0.0246758	-1.54646
PI3K/AKT Signaling in Cancer	0.00102226	-1.76354	0.0351029	-1.61697
SUMOylation of DNA damage response and repair proteins	0.00102226	-1.7385	0.00528733	-1.95493
RNA Polymerase II Transcription Termination	0.00102705	-1.70107	0.00528733	-1.99681
SUMOylation of ubiquitinylation proteins	0.00104606	-1.92725	0.00528733	-1.90681
Sensory perception of sweet, bitter, and umami (glutamate) taste	0.00297194	1.89245	0.00805615	2.00776
Sensory perception of taste	0.00399252	1.85303	0.00585566	2.01786
Rab regulation of trafficking	0.00490907	-1.55328	0.0312233	-1.51667
mRNA 3'-end processing	0.00588741	-1.64581	0.00739006	-1.85461
HATs acetylate histones	0.00638459	-1.59489	0.0374703	-1.59865
Transcriptional Regulation by E2F6	0.00669342	-1.69604	0.00528733	-1.93048
Miscellaneous transport and binding events	0.00851681	-1.75305	0.0157378	-1.86081
Mitotic Prometaphase	0.0088736	-1.47162	0.0216073	-1.5089
Pyruvate metabolism	0.00947113	-1.63846	0.00528733	-2.05976
TNFR1-induced NF-kappa-B signaling pathway	0.0101749	-1.66179	0.0197617	-1.77774
DNA Damage Bypass	0.0119958	-1.63247	0.0392531	-1.66243
Translesion Synthesis by POLH	0.0129104	-1.70116	0.0471927	-1.73579
Processing of Capped Intronless Pre-mRNA	0.0178046	-1.6372	0.0241407	-1.81622
Processing of DNA double-strand break ends	0.0188984	-1.53174	0.0330744	-1.65785
Regulation of pyruvate metabolism	0.0259783	-1.57147	0.00715358	-1.94463
PERK regulates gene expression	0.0277066	-1.58682	0.0241407	-1.77547

## Sheet: Table S6
Table S6. WGCNA co-expression modules
Trait	Top Module	Adj.p.value	Major enriched pathway
Time	Module 1	0.0051	Class C/3 (Metabotropic glutamate/pheromone receptors)
			Sensory perception of taste
			Muscle contraction
	Module 3	0.009	Respiratory electron transport
			mRNA Splicing - Minor Pathway
			Mitochondrial translation elongation
	Module 20	0.009	Base Excision Repair
			Processing of Capped Intron-Containing Pre-mRNA
PTSD	Module 26	0.08	Neddylation
			Peroxisomal protein import
			Class A/1 (Rhodopsin-like receptors)
	Module 15	0.08	GABA B receptor activation
			Signaling by GPCR
			Opioid Signalling
	Module 16	0.26	C-type lectin receptors (CLRs)
			Neutrophil degranulation
			Interleukin-10 signaling
Responsiveness	Module 25	0.031	Neutrophil degranulation
			Antimicrobial peptides
	Module 21	0.033	Antigen activates B Cell Receptor (BCR) leading to generation of second messengers
			CD22 mediated BCR regulation
	Module 15	0.32	GABA B receptor activation
			Signaling by GPCR
			Opioid Signalling
